# Supplementary material for: Secondhand Smoke Induces Liver Steatosis through Deregulation of Genes Involved in Hepatic Lipid Metabolism
Source: PubMed Central journal article supplement (PMC7072934; doi:10.3390/ijms21041296), 2020-02-14
Supplement: ijms-21-01296-s001.pdf [file ijms-21-01296-s001.pdf]

## **SUPPORTING DOCUMENTS**

**Manuscript title:** *Secondhand smoke induces liver steatosis through deregulation of genes involved in hepatic lipid metabolism*

**Authors:** Stella Tommasi, Jae-In Yoon, and Ahmad Besaratinia

### **Content:**

- Supplemental Materials
- Supplemental Figure Legends
- Supplemental Figure 1 and Figure 2
- Supplemental Table 1

## SUPPLEMENTAL MATERIALS

### **Genome-wide gene expression analysis**

To construct the hepatic transcriptome in SHS-exposed mice, we used the GeneChip® Mouse Genome 430 2.0 Array (originally from Affymetrix Inc., Santa Clara, CA; currently Thermo Fisher Scientific, Waltham, MA). This microarray platform enables interrogation of over 39,000 transcripts and variants from more than 34,000 well-characterized mouse genes. Briefly, total RNA was isolated from mouse liver tissues using the RNeasy Mini Kit (Qiagen, Valencia, CA). Before microarray analysis, RNA samples were checked for quality control using the RNA 6000 Nano Chip kit in an Agilent 2100 Bioanalyzer (Agilent Technologies, Santa Clara, CA). Synthesis of double-stranded cDNA from total RNA, fragmentation, hybridization, staining, and microarray scanning were performed according to the manufacturer's instructions. Quality control evaluation, processing and analysis of the gene expression data was performed using the Affymetrix Expression Console™ software (Affymetrix Inc.). The Bioconductor package 'ArrayTools' was then used to identify differentially expressed genes between various experimental groups as compared to non-treated control, based on a cutoff P value of <0.05, and a two-fold change in the level of expression. To establish gene expression trends within each experimental group as well as across all groups, significant gene lists were examined by hierarchical clustering analysis and principal component analysis (PCA) using the Partek® Genomics Suite® software (Partek Incorporated, St. Louis, MO).

### **Reverse transcription quantitative PCR (RT-qPCR)**

Total RNA (0.5 µg) from mouse liver was treated with DNase I and reverse transcribed into cDNA using the iScript™ Reverse Transcription Supermix (Bio-Rad laboratories, Inc., Hercules, CA).

The synthesized cDNA (10 ng) was then PCR amplified using gene-specific primers and the SsoAdvanced™ Universal SYBR® Green Supermix (Bio-Rad laboratories, Inc., Hercules, CA). The mouse glyceraldehyde-3-phosphate dehydrogenase (*Gapdh*) was used as a reference gene. All PCR reactions were carried out using the CFX96 Touch™ Real-Time PCR detection system (Bio-Rad Laboratories, Hercules, CA). The cycling conditions included a pre-incubation step at 95°C for 2 minutes, followed by forty cycles at 95°C for 5 seconds and 58°C for 30 seconds. All reactions (5 samples per group) were performed in triplicate for a total of 15 reactions per biological set. Fold changes in the transcript levels were calculated in the biological sets (i.e., experimental versus control) using the Bio-Rad CFX Maestro™ software (Bio-Rad Laboratories, Hercules, CA). The primer sets used for RT-qPCR are available upon request.

## **SUPPLEMENTAL FIGURE LEGENDS**

**Supplemental Figure 1. Functional network analysis of aberrantly expressed genes in SHS exposed mice.** The 153-gene list was imported into IPA® software and functional network analysis was performed. The top impacted networks are illustrated and show extensive involvement of genes relevant to lipid metabolism and biosynthesis. Other relevant gene networks included molecules implicated in behavior and nervous system development and function, cell death and survival, drug metabolism and small molecule biochemistry. Red and green nodes represent upregulated and down-regulated genes, respectively. The intensity of the red and green color indicates the level of up-regulation and down-regulation, respectively. White nodes show molecules that are not included in the datasets but interact with other components of the network. Solid and dotted lines indicate a direct or indirect relationship, respectively, among molecules.

**Supplemental Figure 2. Chart of mice body weights.** (A) Control mice (sham-exposure in clean air). (B) 4-month SHS-exposed mice, during treatment and after recovery time in clean air. Results are expressed as medians + 95% CIs.



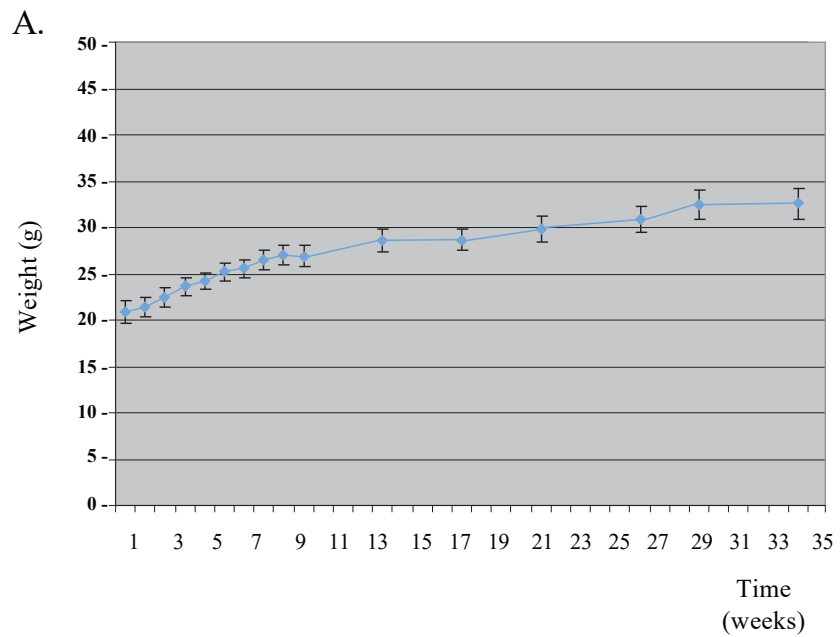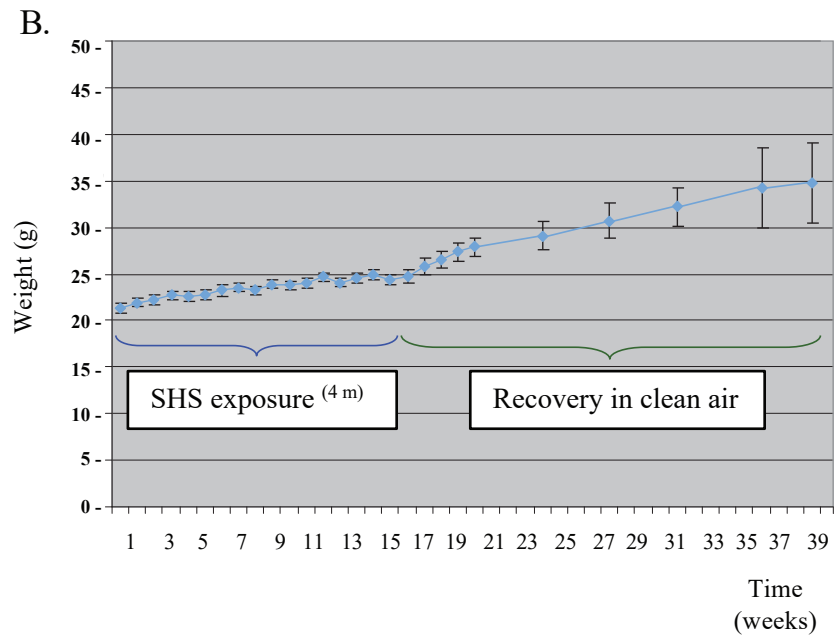

**Suppl. Figure 2**

**Supplemental Table 1: Compiled lists of aberrant transcripts identified by microarray analysis in the various contrast groups.**

**SHS<sup>4</sup> vs C**

|    | Probeset_id  | Log2Ratio.1 | P.Value     | Adj.P.Value | Symbol   | Description                                                 | Chromosome | GenBank   |
|----|--------------|-------------|-------------|-------------|----------|-------------------------------------------------------------|------------|-----------|
| 1  | 1428942_at   | 5.84352     | 4.05E-13    | 2.37E-09    | Mt2      | metallothionein 2                                           | 8          | AA796766  |
| 2  | 1422557_s_at | 5.30464     | 2.27E-09    | 9.10E-07    | Mt1      | metallothionein 1                                           | 8          | NM_013602 |
| 3  | 1422257_s_at | 4.29557     | 1.21E-09    | 5.82E-07    | Cyp2b10  | cytochrome P450, family 2, subfamily b, polypeptide 10      | 7          | NM_009998 |
| 4  | 1425645_s_at | 4.21353     | 8.17E-10    | 4.64E-07    | Cyp2b10  | cytochrome P450, family 2, subfamily b, polypeptide 10      | 7          | AF128849  |
| 5  | 1427747_a_at | 3.97183     | 3.29E-06    | 0.000156818 | Lcn2     | lipocalin 2                                                 | 2          | X14607    |
| 6  | 1451787_at   | 3.89116     | 4.60E-10    | 3.41E-07    | Cyp2b10  | cytochrome P450, family 2, subfamily b, polypeptide 10      | 7          | AF128849  |
| 7  | 1442025_a_at | 3.46291     | 1.51E-05    | 0.000444652 |          |                                                             |            | AI467657  |
| 8  | 1418918_at   | 3.35596     | 3.07E-05    | 0.000745593 | Igfbp1   | insulin-like growth factor binding protein 1                | 11         | NM_008341 |
| 9  | 1417168_a_at | 3.32643     | 3.05E-08    | 6.12E-06    | Usp2     | ubiquitin specific peptidase 2                              | 9          | AI553394  |
| 10 | 1419874_x_at | 3.24507     | 9.63E-06    | 0.000331041 | Zbtb16   | zinc finger and BTB domain containing 16                    | 9          | AA419994  |
| 11 | 1426037_a_at | 2.97804     | 0.000111751 | 0.00186664  | Rgs16    | regulator of G-protein signaling 16                         | 1          | U94828    |
| 12 | 1417169_at   | 2.94705     | 5.70E-09    | 1.84E-06    | Usp2     | ubiquitin specific peptidase 2                              | 9          | AI553394  |
| 13 | 1439489_at   | 2.9461      | 8.04E-14    | 1.04E-09    | Gpr120   | G protein-coupled receptor 120                              | 19         | AV025152  |
| 14 | 1416125_at   | 2.77194     | 8.03E-10    | 4.64E-07    | Fkbp5    | FK506 binding protein 5                                     | 17         | U16959    |
| 15 | 1419149_at   | 2.76286     | 0.00135917  | 0.0116112   | Serpine1 | serine (or cysteine) peptidase inhibitor, clade E, member 1 | 5          | NM_008871 |
| 16 | 1427473_at   | 2.75153     | 1.07E-13    | 1.04E-09    | Gstm3    | glutathione S-transferase, mu 3                             | 3          | J03953    |
| 17 | 1420438_at   | 2.72089     | 3.31E-06    | 0.000157    | Orm2     | orosomucoid 2                                               | 4          | NM_011016 |
| 18 | 1428223_at   | 2.60089     | 5.01E-06    | 0.000211042 | Mfsd2a   | major facilitator superfamily domain containing 2A          | 4          | AK006096  |
| 19 | 1418288_at   | 2.59881     | 9.09E-06    | 0.000318716 | Lpin1    | lipin 1                                                     | 12         | NM_015763 |
| 20 | 1460241_a_at | 2.58887     | 7.52E-09    | 2.25E-06    | St3gal5  | ST3 beta-galactoside alpha-2,3-sialyltransferase 5          | 6          | BB829192  |
| 21 | 1443137_at   | 2.58277     | 6.76E-08    | 1.07E-05    |          |                                                             |            | BB534298  |
| 22 | 1442026_at   | 2.50094     | 1.07E-05    | 0.000356174 |          |                                                             |            | AI467657  |
| 23 | 1433966_x_at | 2.49832     | 0.000588845 | 0.00624027  | Asns     | asparagine synthetase                                       | 6          | AV212753  |
| 24 | 1451204_at   | 2.47248     | 8.27E-06    | 0.000298352 | Scara5   | scavenger receptor class A, member 5 (putative)             | 14         | BC016096  |
| 25 | 1426516_a_at | 2.44265     | 1.71E-05    | 0.000485608 | Lpin1    | lipin 1                                                     | 12         | AK014526  |
| 26 | 1455265_a_at | 2.44113     | 4.82E-05    | 0.00102418  | Rgs16    | regulator of G-protein signaling 16                         | 1          | BB100249  |
| 27 | 1419590_at   | 2.41136     | 0.00127051  | 0.0110635   |          |                                                             |            | NM_010000 |
| 28 | 1439163_at   | 2.36604     | 2.81E-05    | 0.000698778 | Zbtb16   | zinc finger and BTB domain containing 16                    | 9          | BQ174973  |
| 29 | 1434202_a_at | 2.34657     | 7.14E-05    | 0.00136919  | Fam107a  | family with sequence similarity 107, member A               | 14         | BF682848  |
| 30 | 1428306_at   | 2.33114     | 0.000341604 | 0.00422706  | Ddit4    | DNA-damage-inducible transcript 4                           | 10         | AK017926  |
| 31 | 1427474_s_at | 2.28106     | 1.73E-13    | 1.27E-09    | Gstm3    | glutathione S-transferase, mu 3                             | 3          | J03953    |
| 32 | 1451190_a_at | 2.24992     | 5.16E-09    | 1.72E-06    | Sbk1     | SH3-binding kinase 1                                        | 7          | BC025837  |
| 33 | 1451612_at   | 2.23894     | 5.87E-11    | 8.59E-08    | Mt1      | metallothionein 1                                           | 8          | BC027262  |

|    |              |         |             |             |          |                                                                               |              |
|----|--------------|---------|-------------|-------------|----------|-------------------------------------------------------------------------------|--------------|
| 34 | 1429144_at   | 2.23539 | 2.35E-06    | 0.000124092 | Gpcpd1   | glycerophosphocholine phosphodiesterase GDE1 homolog ( <i>S. cerevisiae</i> ) | 2 AV291259   |
| 35 | 1425837_a_at | 2.20967 | 0.00027494  | 0.00360299  |          |                                                                               | AF199491     |
| 36 | 1449198_a_at | 2.17858 | 1.32E-09    | 6.05E-07    | St3gal5  | ST3 beta-galactoside alpha-2,3-sialyltransferase 5                            | 6 BB829192   |
| 37 | 1453410_at   | 2.17309 | 2.24E-07    | 2.40E-05    | Angptl4  | angiopoietin-like 4                                                           | 17 AK014564  |
| 38 | 1434437_x_at | 2.16912 | 5.03E-07    | 4.13E-05    | Rrm2     | ribonucleotide reductase M2                                                   | 12 AV301324  |
| 39 | 1419857_at   | 2.14086 | 1.51E-06    | 9.19E-05    |          |                                                                               | AA254866     |
| 40 | 1448239_at   | 2.11829 | 3.52E-07    | 3.26E-05    | Hmox1    | heme oxygenase (decycling) 1                                                  | 8 NM_010442  |
| 41 | 1424744_at   | 2.10163 | 6.61E-10    | 4.21E-07    | Sds      | serine dehydratase                                                            | 5 BC021950   |
| 42 | 1450505_a_at | 2.09765 | 2.05E-11    | 4.43E-08    | Fam134b  | family with sequence similarity 134, member B                                 | 15 NM_025459 |
| 43 | 1451548_at   | 2.08634 | 4.55E-06    | 0.000197361 | Upp2     | uridine phosphorylase 2                                                       | 2 BC027189   |
| 44 | 1453023_at   | 2.07393 | 6.69E-08    | 1.07E-05    |          |                                                                               | AK003441     |
| 45 | 1434473_at   | 2.0467  | 2.57E-05    | 0.00065555  | Slc16a5  | solute carrier family 16 (monocarboxylic acid transporters), member 5         | 11 AI647939  |
| 46 | 1427912_at   | 2.04574 | 1.87E-09    | 7.93E-07    | Cbr3     | carbonyl reductase 3                                                          | 16 AK003232  |
| 47 | 1426452_a_at | 2.03623 | 4.68E-05    | 0.00100547  | Rab30    | RAB30, member RAS oncogene family                                             | 7 BG070713   |
| 48 | 1435188_at   | 2.03088 | 1.09E-06    | 7.30E-05    | Gm129    | predicted gene 129                                                            | 3 BB407125   |
| 49 | 1428923_at   | 2.02896 | 0.000408536 | 0.00479619  | Ppp1r3g  | protein phosphatase 1, regulatory (inhibitor) subunit 3G                      | 13 AK005570  |
| 50 | 1423978_at   | 2.01376 | 1.63E-09    | 7.15E-07    | Sbk1     | SH3-binding kinase 1                                                          | 7 BC025837   |
| 51 | 1460059_at   | 2.01241 | 8.24E-10    | 4.64E-07    | Upp2     | uridine phosphorylase 2                                                       | 2 BB272732   |
| 52 | 1451095_at   | 1.99085 | 9.74E-05    | 0.00169291  | Asns     | asparagine synthetase                                                         | 6 BC005552   |
| 53 | 1424969_s_at | 1.98321 | 2.57E-06    | 0.000132034 | Upp2     | uridine phosphorylase 2                                                       | 2 BC027189   |
| 54 | 1448162_at   | 1.98316 | 1.09E-08    | 2.94E-06    | Vcam1    | vascular cell adhesion molecule 1                                             | 3 BB250384   |
| 55 | 1435495_at   | 1.97942 | 1.29E-09    | 6.05E-07    | Adoral   | adenosine A1 receptor                                                         | 1 BE630294   |
| 56 | 1423233_at   | 1.95653 | 1.77E-07    | 2.00E-05    | Cebpδ    | CCAAT/enhancer binding protein (C/EBP), delta                                 | 16 BB831146  |
| 57 | 1455958_s_at | 1.9231  | 7.21E-12    | 2.35E-08    | Pptc7    | PTC7 protein phosphatase homolog ( <i>S. cerevisiae</i> )                     | 5 AI881989   |
| 58 | 1416286_at   | 1.92027 | 4.05E-07    | 3.54E-05    | Rgs4     | regulator of G-protein signaling 4                                            | 1 NM_009062  |
| 59 | 1448226_at   | 1.91427 | 1.46E-05    | 0.000437558 | Rrm2     | ribonucleotide reductase M2                                                   | 12 NM_009104 |
| 60 | 1417761_at   | 1.91092 | 6.88E-08    | 1.08E-05    | Apoa4    | apolipoprotein A-IV                                                           | 9 BC010769   |
| 61 | 1416933_at   | 1.90963 | 6.80E-11    | 9.48E-08    | Por      | P450 (cytochrome) oxidoreductase                                              | 5 NM_008898  |
| 62 | 1450611_at   | 1.90332 | 1.11E-05    | 0.000364548 | Orm3     | orosomuroid 3                                                                 | 4 NM_013623  |
| 63 | 1452426_x_at | 1.882   | 6.01E-05    | 0.00121616  |          |                                                                               | BC004065     |
| 64 | 1437751_at   | 1.87139 | 6.09E-08    | 9.92E-06    | Ppargc1a | peroxisome proliferative activated receptor, gamma, coactivator 1 alpha       | 5 AV337619   |
| 65 | 1456395_at   | 1.85383 | 1.17E-08    | 3.04E-06    | Ppargc1a | peroxisome proliferative activated receptor, gamma, coactivator 1 alpha       | 5 BM120569   |
| 66 | 1434292_at   | 1.85189 | 9.75E-08    | 1.41E-05    | Snhg11   | small nucleolar RNA host gene 11 (non-protein coding)                         | 2 BI731047   |
| 67 | 1460336_at   | 1.84569 | 4.48E-08    | 7.96E-06    | Ppargc1a | peroxisome proliferative activated receptor, gamma, coactivator 1 alpha       | 5 BB745167   |
| 68 | 1421041_s_at | 1.82573 | 4.29E-07    | 3.69E-05    |          |                                                                               | NM_008182    |
| 69 | 1436853_a_at | 1.81712 | 6.28E-05    | 0.00125154  | Snca     | synuclein, alpha                                                              | 6 AI324124   |



|     |              |         |             |             |               |                                                                         |    |           |
|-----|--------------|---------|-------------|-------------|---------------|-------------------------------------------------------------------------|----|-----------|
| 70  | 1416432_at   | 1.81024 | 0.000284    | 0.0036871   | Pfkfb3        | 6-phosphofructo-2-kinase/fructose-2,6-biphosphatase 3                   | 2  | NM_133232 |
| 71  | 1426980_s_at | 1.79789 | 1.72E-10    | 1.74E-07    | E130012A19Rik | RIKEN cDNA E130012A19 gene                                              | 11 | BC006054  |
| 72  | 1443870_at   | 1.79035 | 1.27E-08    | 3.21E-06    | Abcc4         | ATP-binding cassette, sub-family C (CFTR/MRP), member 4                 | 14 | BB291885  |
| 73  | 1450970_at   | 1.79022 | 2.61E-08    | 5.51E-06    | Got1          | glutamate oxaloacetate transaminase 1, soluble                          | 19 | AA792094  |
| 74  | 1416411_at   | 1.78582 | 1.70E-10    | 1.74E-07    | Gstm2         | glutathione S-transferase, mu 2                                         | 3  | NM_008183 |
| 75  | 1439617_s_at | 1.76601 | 5.04E-06    | 0.000211858 | Pck1          | phosphoenolpyruvate carboxykinase 1, cytosolic                          | 2  | AI265463  |
| 76  | 1418780_at   | 1.76264 | 9.91E-08    | 1.42E-05    | Cyp39a1       | cytochrome P450, family 39, subfamily a, polypeptide 1                  | 17 | NM_018887 |
| 77  | 1429206_at   | 1.75531 | 1.11E-07    | 1.49E-05    | Rhobtb1       | Rho-related BTB domain containing 1                                     | 10 | AK014194  |
| 78  | 1440084_at   | 1.74163 | 1.74E-05    | 0.000492191 |               |                                                                         |    | AV380966  |
| 79  | 1452416_at   | 1.74109 | 6.54E-08    | 1.05E-05    | Il6ra         | interleukin 6 receptor, alpha                                           | 3  | X53802    |
| 80  | 1436504_x_at | 1.73114 | 7.06E-08    | 1.09E-05    | Apoa4         | apolipoprotein A-IV                                                     | 9  | AV027367  |
| 81  | 1422217_a_at | 1.68022 | 1.80E-05    | 0.000503219 | Cyp1a1        | cytochrome P450, family 1, subfamily a, polypeptide 1                   | 9  | NM_009992 |
| 82  | 1458442_at   | 1.67999 | 0.00175723  | 0.0139958   | AI132709      | expressed sequence AI132709                                             | 7  | AI266897  |
| 83  | 1428512_at   | 1.66989 | 3.53E-05    | 0.000827142 | Bhlhb9        | basic helix-loop-helix domain containing, class B9                      | X  | AK012577  |
| 84  | 1436538_at   | 1.66965 | 0.00166756  | 0.0134757   | Ankrd37       | ankyrin repeat domain 37                                                | 8  | AV084342  |
| 85  | 1434099_at   | 1.65966 | 9.59E-08    | 1.39E-05    | Ppargc1a      | peroxisome proliferative activated receptor, gamma, coactivator 1 alpha | 5  | BB752393  |
| 86  | 1429639_at   | 1.64707 | 3.90E-05    | 0.000880806 | Gpcpd1        | glycerophosphocholine phosphodiesterase GDE1 homolog (S. cerevisiae)    | 2  | AK009137  |
| 87  | 1449525_at   | 1.64667 | 2.36E-08    | 5.24E-06    | Fmo3          | flavin containing monooxygenase 3                                       | 1  | NM_008030 |
| 88  | 1423627_at   | 1.6453  | 6.53E-10    | 4.21E-07    | Nqo1          | NAD(P)H dehydrogenase, quinone 1                                        | 8  | AV158882  |
| 89  | 1424683_at   | 1.63015 | 1.53E-09    | 6.90E-07    | Fam134b       | family with sequence similarity 134, member B                           | 15 | BC019494  |
| 90  | 1441971_at   | 1.62955 | 1.54E-05    | 0.000449462 |               |                                                                         |    | AW543723  |
| 91  | 1450788_at   | 1.62411 | 0.00931516  | 0.0469457   | Saa1          | serum amyloid A 1                                                       | 7  | NM_009117 |
| 92  | 1449498_at   | 1.62282 | 1.14E-05    | 0.00037095  | Marco         | macrophage receptor with collagenous structure                          | 1  | NM_010766 |
| 93  | 1418595_at   | 1.62005 | 7.95E-06    | 0.000290898 | Plin4         | perilipin 4                                                             | 17 | NM_020568 |
| 94  | 1426850_a_at | 1.61259 | 1.14E-06    | 7.52E-05    | Map2k6        | mitogen-activated protein kinase kinase 6                               | 11 | BB261602  |
| 95  | 1416332_at   | 1.60988 | 2.85E-06    | 0.000141625 | Cirbp         | cold inducible RNA binding protein                                      | 10 | NM_007705 |
| 96  | 1437953_at   | 1.60608 | 1.67E-05    | 0.000477846 | Gpcpd1        | glycerophosphocholine phosphodiesterase GDE1 homolog (S. cerevisiae)    | 2  | BM246706  |
| 97  | 1428352_at   | 1.60558 | 0.000503416 | 0.00557065  | Aradc2        | arrestin domain containing 2                                            | 8  | AW542672  |
| 98  | 1434100_x_at | 1.60175 | 1.09E-07    | 1.48E-05    | Ppargc1a      | peroxisome proliferative activated receptor, gamma, coactivator 1 alpha | 5  | BB752393  |
| 99  | 1419075_s_at | 1.59708 | 0.0137577   | 0.0620865   |               |                                                                         |    | NM_011314 |
| 100 | 1440325_at   | 1.59699 | 0.00039847  | 0.00470615  |               |                                                                         |    | AV332226  |
| 101 | 1431213_a_at | 1.58832 | 0.000285772 | 0.00370224  |               |                                                                         |    | BG297038  |
| 102 | 1456960_at   | 1.5838  | 0.0123625   | 0.0574266   |               |                                                                         |    | BB555069  |
| 103 | 1457438_at   | 1.567   | 2.94E-07    | 2.89E-05    |               |                                                                         |    | BE630363  |
| 104 | 1455869_at   | 1.54825 | 0.000245394 | 0.00331066  |               |                                                                         |    | BG862223  |
| 105 | 1416953_at   | 1.54136 | 1.59E-06    | 9.43E-05    | Ctgf          | connective tissue growth factor                                         | 10 | NM_010217 |

|     |              |         |             |             |               |                                                                      |
|-----|--------------|---------|-------------|-------------|---------------|----------------------------------------------------------------------|
| 106 | 1438313_at   | 1.5313  | 0.00075336  | 0.00748557  |               | BB233366                                                             |
| 107 | 1418493_a_at | 1.52271 | 0.00012644  | 0.0020301   | Snca          | synuclein, alpha                                                     |
| 108 | 1428926_at   | 1.51782 | 2.11E-11    | 4.43E-08    | 1110003O08Rik | RIKEN cDNA 1110003O08 gene                                           |
| 109 | 1435459_at   | 1.51389 | 3.20E-05    | 0.0007706   | Fmo2          | flavin containing monooxygenase 2                                    |
| 110 | 1456156_at   | 1.50843 | 6.10E-08    | 9.92E-06    | Lepr          | leptin receptor                                                      |
| 111 | 1454799_at   | 1.49193 | 9.02E-05    | 0.00159979  | Agpat9        | 1-acylglycerol-3-phosphate O-acyltransferase 9                       |
| 112 | 1427537_at   | 1.48986 | 7.19E-07    | 5.45E-05    | Eppk1         | epiplakin 1                                                          |
| 113 | 1425281_a_at | 1.48115 | 0.00121457  | 0.0106793   | Tsc22d3       | TSC22 domain family, member 3                                        |
| 114 | 1422230_s_at | 1.47736 | 5.39E-10    | 3.76E-07    |               | NM_007812                                                            |
| 115 | 1428650_at   | 1.47609 | 7.19E-11    | 9.57E-08    | Tns1          | tensin 1                                                             |
| 116 | 1436948_a_at | 1.46775 | 6.32E-07    | 4.96E-05    | Fam70a        | family with sequence similarity 70, member A                         |
| 117 | 1459897_a_at | 1.45271 | 1.13E-05    | 0.000366724 | Sbsn          | suprabasin                                                           |
| 118 | 1419647_a_at | 1.44305 | 0.000256439 | 0.00342176  | Ier3          | immediate early response 3                                           |
| 119 | 1433816_at   | 1.44031 | 7.66E-06    | 0.000282498 | Mcart1        | mitochondrial carrier triple repeat 1                                |
| 120 | 1449326_x_at | 1.44005 | 0.0490335   | 0.152346    | Saa2          | serum amyloid A 2                                                    |
| 121 | 1455002_at   | 1.43506 | 7.32E-08    | 1.11E-05    | Ptp4a1        | protein tyrosine phosphatase 4a1                                     |
| 122 | 1417602_at   | 1.42933 | 7.78E-06    | 0.000285692 | Per2          | period homolog 2 (Drosophila)                                        |
| 123 | 1419329_at   | 1.42749 | 1.73E-09    | 7.44E-07    | Sorbs3        | sorbin and SH3 domain containing 3                                   |
| 124 | 1419024_at   | 1.42248 | 1.81E-05    | 0.000506149 | Ptp4a1        | protein tyrosine phosphatase 4a1                                     |
| 125 | 1427425_at   | 1.42059 | 2.96E-08    | 6.02E-06    | 9130208E07Rik | RIKEN cDNA 9130208E07 gene                                           |
| 126 | 1451355_at   | 1.41651 | 8.88E-10    | 4.65E-07    | Acer2         | alkaline ceramidase 2                                                |
| 127 | 1417042_at   | 1.41171 | 3.79E-09    | 1.37E-06    | Slc37a4       | solute carrier family 37 (glucose-6-phosphate transporter), member 4 |
| 128 | 1440840_at   | 1.41121 | 7.01E-08    | 1.09E-05    | D630004K10Rik | RIKEN cDNA D630004K10 gene                                           |
| 129 | 1416926_at   | 1.4101  | 0.000259761 | 0.00345037  | Trp53inp1     | transformation related protein 53 inducible nuclear protein 1        |
| 130 | 1419582_at   | 1.4005  | 8.49E-09    | 2.46E-06    | Cyp2c55       | cytochrome P450, family 2, subfamily c, polypeptide 55               |
| 131 | 1429050_at   | 1.40022 | 2.49E-08    | 5.37E-06    | Chic2         | cysteine-rich hydrophobic domain 2                                   |
| 132 | 1448950_at   | 1.39128 | 1.77E-05    | 0.000497803 | Il1r1         | interleukin 1 receptor, type I                                       |
| 133 | 1423891_at   | 1.38748 | 4.82E-05    | 0.00102418  | Gstt3         | glutathione S-transferase, theta 3                                   |
| 134 | 1445574_at   | 1.38493 | 4.47E-05    | 0.000975767 |               | BG067678                                                             |
| 135 | 1423439_at   | 1.38431 | 5.78E-06    | 0.000233975 | Pck1          | phosphoenolpyruvate carboxykinase 1, cytosolic                       |
| 136 | 1453851_a_at | 1.37658 | 0.0100545   | 0.0496727   | Gadd45g       | growth arrest and DNA-damage-inducible 45 gamma                      |
| 137 | 1439293_at   | 1.36318 | 0.00114944  | 0.0102843   | BC031353      | cDNA sequence BC031353                                               |
| 138 | 1452135_at   | 1.36202 | 3.41E-07    | 3.19E-05    | Gpx6          | glutathione peroxidase 6                                             |
| 139 | 1422905_s_at | 1.34691 | 1.71E-05    | 0.000485401 | Fmo2          | flavin containing monooxygenase 2                                    |
| 140 | 1426599_a_at | 1.34454 | 0.000122087 | 0.00198634  | Slc2a1        | solute carrier family 2 (facilitated glucose transporter), member 1  |
| 141 | 1435697_a_at | 1.34394 | 1.48E-07    | 1.81E-05    | Cytip         | cytohesin 1 interacting protein                                      |
| 142 | 1449851_at   | 1.34183 | 2.76E-05    | 0.000687934 | Per1          | period homolog 1 (Drosophila)                                        |
| 143 | 1453101_at   | 1.33928 | 1.01E-05    | 0.000342324 | Klhl25        | kelch-like 25 (Drosophila)                                           |
| 144 | 1417130_s_at | 1.33813 | 0.000779471 | 0.00765161  | Angptl4       | angiopoietin-like 4                                                  |
| 145 | 1449007_at   | 1.33548 | 3.07E-09    | 1.18E-06    |               | NM_009770                                                            |

|     |              |         |             |             |               |                                                                                       |    |           |
|-----|--------------|---------|-------------|-------------|---------------|---------------------------------------------------------------------------------------|----|-----------|
| 146 | 1421852_at   | 1.33546 | 0.000991741 | 0.00921954  | Kcnk5         | potassium channel, subfamily K, member 5                                              | 14 | AF319542  |
| 147 | 1435666_at   | 1.32614 | 6.92E-10    | 4.32E-07    | Mast3         | microtubule associated serine/threonine kinase 3                                      | 8  | AW553439  |
| 148 | 1424629_at   | 1.31389 | 3.55E-07    | 3.26E-05    | Brca1         | breast cancer 1                                                                       | 11 | U31625    |
| 149 | 1434456_at   | 1.3114  | 3.88E-07    | 3.44E-05    | Rundc3b       | RUN domain containing 3B                                                              | 5  | BG075955  |
| 150 | 1436194_at   | 1.30914 | 2.12E-07    | 2.31E-05    | Prelid2       | PRELI domain containing 2                                                             | 18 | BE985366  |
| 151 | 1434773_a_at | 1.30634 | 0.000320374 | 0.00402038  | Slc2a1        | solute carrier family 2 (facilitated glucose transporter), member 1                   | 4  | BM207588  |
| 152 | 1454712_at   | 1.29993 | 1.69E-05    | 0.000479895 | Mcart1        | mitochondrial carrier triple repeat 1                                                 | 4  | AW212577  |
| 153 | 1434502_x_at | 1.29665 | 2.52E-05    | 0.000645383 | Slc4a1        | solute carrier family 4 (anion exchanger), member 1                                   | 11 | BB448377  |
| 154 | 1429671_at   | 1.2962  | 0.00012536  | 0.00202052  | Scand3        | SCAN domain containing 3                                                              | 5  | AK010551  |
| 155 | 1451452_a_at | 1.29039 | 3.81E-05    | 0.000866233 | Rgs16         | regulator of G-protein signaling 16                                                   | 1  | U72881    |
| 156 | 1449945_at   | 1.27738 | 9.80E-06    | 0.000335034 | Ppargc1b      | peroxisome proliferative activated receptor, gamma, coactivator 1 beta                | 18 | NM_133249 |
| 157 | 1441915_s_at | 1.27147 | 2.16E-05    | 0.000572773 | Plin5         | perilipin 5                                                                           | 17 | BB717485  |
| 158 | 1427258_at   | 1.27035 | 5.23E-08    | 8.92E-06    | Trim24        | tripartite motif-containing 24                                                        | 6  | BB611004  |
| 159 | 1424638_at   | 1.26536 | 0.0499934   | 0.154415    | Cdkn1a        | cyclin-dependent kinase inhibitor 1A (P21)                                            | 17 | AK007630  |
| 160 | 1433604_x_at | 1.2623  | 2.33E-10    | 2.20E-07    | Aldoa         | aldolase A, fructose-bisphosphate                                                     | 7  | BG065457  |
| 161 | 1433610_at   | 1.26094 | 0.000646487 | 0.00668611  | AA986860      | expressed sequence AA986860                                                           | 1  | BB522283  |
| 162 | 1451206_s_at | 1.26012 | 7.58E-07    | 5.68E-05    | Cytip         | cytohesin 1 interacting protein                                                       | 2  | BC007144  |
| 163 | 1417969_at   | 1.25644 | 5.72E-10    | 3.89E-07    | Fbxo31        | F-box protein 31                                                                      | 8  | NM_133765 |
| 164 | 1427638_at   | 1.255   | 0.00034247  | 0.0042342   | Zbtb16        | zinc finger and BTB domain containing 16                                              | 9  | Z47205    |
| 165 | 1420630_at   | 1.25458 | 1.63E-11    | 4.43E-08    | 8430419L09Rik | RIKEN cDNA 8430419L09 gene                                                            | 6  | NM_028982 |
| 166 | 1418488_s_at | 1.25332 | 5.81E-07    | 4.65E-05    | Ripk4         | receptor-interacting serine-threonine kinase 4                                        | 16 | AF302127  |
| 167 | 1424401_at   | 1.25294 | 2.81E-07    | 2.80E-05    | Aldh1l1       | aldehyde dehydrogenase 1 family, member L1                                            | 6  | AK007822  |
| 168 | 1421040_a_at | 1.25158 | 1.20E-06    | 7.79E-05    | Gsta2         | glutathione S-transferase, alpha 2 (Yc2)                                              | 9  | NM_008182 |
| 169 | 1458701_at   | 1.25062 | 3.00E-05    | 0.000735947 | Gpcpd1        | glycerophosphocholine phosphodiesterase GDE1 homolog (S. cerevisiae)                  | 2  | BB550273  |
| 170 | 1460510_a_at | 1.2399  | 1.63E-05    | 0.000468515 | Coq10b        | coenzyme Q10 homolog B (S. cerevisiae)                                                | 1  | AK006551  |
| 171 | 1418099_at   | 1.2369  | 4.58E-05    | 0.000992955 | Tnfrsf1b      | tumor necrosis factor receptor superfamily, member 1b                                 | 4  | M60469    |
| 172 | 1424943_at   | 1.23684 | 0.00102641  | 0.00946678  | Cyp4a31       | cytochrome P450, family 4, subfamily a, polypeptide 31                                | 4  | BC013476  |
| 173 | 1449824_at   | 1.23488 | 8.02E-07    | 5.95E-05    | Prg4          | proteoglycan 4 (megakaryocyte stimulating factor, articular superficial zone protein) | 1  | NM_021400 |
| 174 | 1436766_at   | 1.2324  | 0.00469294  | 0.0286963   | Luc7l2        | LUC7-like 2 (S. cerevisiae)                                                           | 6  | BB475271  |
| 175 | 1424937_at   | 1.23001 | 0.000160818 | 0.00242277  | Plin5         | perilipin 5                                                                           | 17 | BC024138  |
| 176 | 1416250_at   | 1.22376 | 0.00787945  | 0.0416813   | Btg2          | B-cell translocation gene 2, anti-proliferative                                       | 1  | NM_007570 |
| 177 | 1448021_at   | 1.22165 | 2.45E-05    | 0.000630588 |               |                                                                                       |    | AA266723  |
| 178 | 1420772_a_at | 1.22037 | 0.00635195  | 0.0357657   | Tsc22d3       | TSC22 domain family, member 3                                                         | X  | NM_010286 |
| 179 | 1436544_at   | 1.2069  | 1.89E-08    | 4.30E-06    | Atp10d        | ATPase, class V, type 10D                                                             | 5  | BB016769  |
| 180 | 1426663_s_at | 1.20548 | 0.00718174  | 0.0391279   | Slc45a3       | solute carrier family 45, member 3                                                    | 1  | BC024519  |
| 181 | 1419283_s_at | 1.19979 | 2.72E-10    | 2.30E-07    | Tns1          | tensin 1                                                                              | 1  | NM_027884 |
| 182 | 1432517_a_at | 1.19936 | 1.32E-05    | 0.000408203 | Nnmt          | nicotinamide N-methyltransferase                                                      | 9  | AK006371  |

|     |              |         |             |             |               |                                                                        |    |           |
|-----|--------------|---------|-------------|-------------|---------------|------------------------------------------------------------------------|----|-----------|
| 183 | 1429809_at   | 1.19724 | 3.23E-08    | 6.27E-06    | Tmtc2         | transmembrane and tetratricopeptide repeat containing 2                | 10 | AK018506  |
| 184 | 1438815_at   | 1.18828 | 4.71E-05    | 0.0010077   |               |                                                                        |    | BB360457  |
| 185 | 1449565_at   | 1.18812 | 2.96E-05    | 0.000729109 | Cyp2g1        | cytochrome P450, family 2, subfamily g, polypeptide 1                  | 7  | NM_013809 |
| 186 | 1429273_at   | 1.18617 | 1.16E-06    | 7.61E-05    | Bmper         | BMP-binding endothelial regulator                                      | 9  | AK014221  |
| 187 | 1434799_x_at | 1.18441 | 4.77E-10    | 3.41E-07    | Aldoa         | aldolase A, fructose-bisphosphate                                      | 7  | BG793658  |
| 188 | 1425824_a_at | 1.17838 | 0.000275115 | 0.00360368  | Pcsk4         | proprotein convertase subtilisin/kexin type 4                          | 10 | D01093    |
| 189 | 1443960_at   | 1.17668 | 2.25E-10    | 2.20E-07    |               |                                                                        |    | BQ175377  |
| 190 | 1424599_at   | 1.17563 | 1.02E-05    | 0.000343048 | Fgl1          | fibrinogen-like protein 1                                              | 8  | BC021946  |
| 191 | 1434059_at   | 1.17406 | 2.79E-11    | 5.10E-08    | B230312A22Rik | RIKEN cDNA B230312A22 gene                                             | 4  | BB769694  |
| 192 | 1434856_at   | 1.17396 | 1.38E-06    | 8.62E-05    | Ankrd44       | ankyrin repeat domain 44                                               | 1  | AV256780  |
| 193 | 1416921_x_at | 1.16625 | 1.31E-09    | 6.05E-07    | Aldoa         | aldolase A, fructose-bisphosphate                                      | 7  | NM_007438 |
| 194 | 1442039_at   | 1.1662  | 8.23E-05    | 0.00150673  | Tox           | thymocyte selection-associated high mobility group box                 | 4  | BF020502  |
| 195 | 1460406_at   | 1.16415 | 3.89E-09    | 1.37E-06    | Pls1          | plastin 1 (I-isoform)                                                  | 9  | BC026410  |
| 196 | 1421681_at   | 1.16306 | 0.001264    | 0.0110297   | Nrg4          | neuregulin 4                                                           | 9  | NM_032002 |
| 197 | 1451069_at   | 1.15681 | 0.00271231  | 0.0191463   | Pim3          | proviral integration site 3                                            | 15 | BC017621  |
| 198 | 1425979_a_at | 1.15603 | 2.13E-06    | 0.00011738  | Fbfl          | Fas (TNFRSF6) binding factor 1                                         | 11 | AF241249  |
| 199 | 1442406_at   | 1.15381 | 3.11E-05    | 0.000752094 | 9230104K21Rik | RIKEN cDNA 9230104K21 gene                                             | 4  | BE852666  |
| 200 | 1424609_a_at | 1.15371 | 0.0038008   | 0.0246036   |               |                                                                        |    | BM225255  |
| 201 | 1432543_a_at | 1.15357 | 2.81E-06    | 0.000140579 | Klf13         | Kruppel-like factor 13                                                 | 7  | AK002926  |
| 202 | 1425627_x_at | 1.14535 | 1.76E-11    | 4.43E-08    | Gstm1         | glutathione S-transferase, mu 1                                        | 3  | J03952    |
| 203 | 1417714_x_at | 1.14438 | 0.000391144 | 0.00464397  |               |                                                                        |    | NM_008218 |
| 204 | 1434817_s_at | 1.14124 | 3.97E-07    | 3.49E-05    | Rprd2         | regulation of nuclear pre-mRNA domain containing 2                     | 3  | BM206427  |
| 205 | 1460011_at   | 1.14112 | 6.15E-05    | 0.0012345   | Cyp26b1       | cytochrome P450, family 26, subfamily b, polypeptide 1                 | 6  | AW049789  |
| 206 | 1427331_at   | 1.13792 | 7.14E-09    | 2.18E-06    | Adora1        | adenosine A1 receptor                                                  | 1  | BB518868  |
| 207 | 1458599_at   | 1.13658 | 3.01E-05    | 0.00073595  |               |                                                                        |    | BB009155  |
| 208 | 1424175_at   | 1.13558 | 1.57E-06    | 9.39E-05    | Tef           | thyrotroph embryonic factor                                            | 15 | BC017689  |
| 209 | 1418492_at   | 1.13349 | 0.0243578   | 0.0932616   | Grem2         | gremlin 2 homolog, cysteine knot superfamily (Xenopus laevis)          | 1  | NM_011825 |
| 210 | 1453303_at   | 1.13112 | 1.22E-06    | 7.87E-05    |               |                                                                        |    | BI076733  |
| 211 | 1456563_at   | 1.12942 | 2.36E-07    | 2.51E-05    | 4933429F08Rik | RIKEN cDNA 4933429F08 gene                                             | 18 | BB769119  |
| 212 | 1453675_at   | 1.12849 | 1.00E-08    | 2.75E-06    | Slc16a10      | solute carrier family 16 (monocarboxylic acid transporters), member 10 | 10 | AK011813  |
| 213 | 1446068_at   | 1.12641 | 0.000681048 | 0.00692198  | Adk           | adenosine kinase                                                       | 14 | BB053697  |
| 214 | 1451804_a_at | 1.12556 | 1.79E-06    | 0.000102369 | Lrrc16a       | leucine rich repeat containing 16A                                     | 13 | BC012229  |
| 215 | 1457117_at   | 1.12434 | 1.62E-05    | 0.000466411 | Nfe2l2        | nuclear factor, erythroid derived 2, like 2                            | 2  | AV248273  |
| 216 | 1424951_at   | 1.12402 | 2.16E-06    | 0.000118108 | Baiap2l1      | BAI1-associated protein 2-like 1                                       | 5  | BC015459  |
| 217 | 1429656_at   | 1.12023 | 3.04E-05    | 0.000740189 | Rhobtb1       | Rho-related BTB domain containing 1                                    | 10 | BB041370  |
| 218 | 1416034_at   | 1.11647 | 0.00102146  | 0.00943896  | Cd24a         | CD24a antigen                                                          | 10 | NM_009846 |
| 219 | 1426942_at   | 1.1138  | 1.07E-06    | 7.26E-05    | Aim1          | absent in melanoma 1                                                   | 10 | BM233292  |
| 220 | 1456405_at   | 1.1136  | 4.50E-05    | 0.000978478 | Dido1         | death inducer-obliterators 1                                           | 2  | BG063067  |

|     |              |         |             |             |               |                                                                     |    |           |
|-----|--------------|---------|-------------|-------------|---------------|---------------------------------------------------------------------|----|-----------|
| 221 | 1419393_at   | 1.10512 | 7.07E-10    | 4.32E-07    | Abcg5         | ATP-binding cassette, sub-family G (WHITE), member 5                | 17 | NM_031884 |
| 222 | 1451814_a_at | 1.10445 | 3.02E-09    | 1.18E-06    | Htatip2       | HIV-1 tat interactive protein 2, homolog (human)                    | 7  | AF061972  |
| 223 | 1427540_at   | 1.10263 | 7.75E-05    | 0.00143969  | Zwint         | ZW10 interactor                                                     | 10 | BC013559  |
| 224 | 1424607_a_at | 1.10141 | 0.00266484  | 0.0189068   |               |                                                                     |    | BM225255  |
| 225 | 1424050_s_at | 1.10102 | 4.18E-05    | 0.000927633 | Fgfr1         | fibroblast growth factor receptor 1                                 | 8  | M33760    |
| 226 | 1425626_at   | 1.10097 | 2.51E-11    | 4.91E-08    | Gstm1         | glutathione S-transferase, mu 1                                     | 3  | J03952    |
| 227 | 1439375_x_at | 1.10087 | 8.61E-10    | 4.64E-07    |               |                                                                     |    | AV030922  |
| 228 | 1451263_a_at | 1.09856 | 8.05E-07    | 5.96E-05    | Fabp4         | fatty acid binding protein 4, adipocyte                             | 3  | BC002148  |
| 229 | 1441042_at   | 1.0947  | 4.39E-09    | 1.51E-06    | Fgfl          | fibroblast growth factor 1                                          | 18 | BE688115  |
| 230 | 1416464_at   | 1.0824  | 3.37E-05    | 0.000799768 | Slc4a1        | solute carrier family 4 (anion exchanger), member 1                 | 11 | NM_011403 |
| 231 | 1426858_at   | 1.08191 | 0.0135943   | 0.0615007   |               |                                                                     |    | BB253137  |
| 232 | 1418249_at   | 1.07913 | 1.56E-10    | 1.69E-07    | Crcp          | calcitonin gene-related peptide-receptor component protein          | 5  | NM_007761 |
| 233 | 1417023_a_at | 1.0723  | 3.39E-06    | 0.000159398 | Fabp4         | fatty acid binding protein 4, adipocyte                             | 3  | NM_024406 |
| 234 | 1437247_at   | 1.06956 | 0.000163626 | 0.00244871  |               |                                                                     |    | BM245170  |
| 235 | 1425921_a_at | 1.06851 | 0.000272059 | 0.00356843  | 1810055G02Rik | RIKEN cDNA 1810055G02 gene                                          | 19 | BC019471  |
| 236 | 1444226_at   | 1.0681  | 1.03E-06    | 7.10E-05    | Foxo3         | forkhead box O3                                                     | 10 | W07885    |
| 237 | 1448265_x_at | 1.06427 | 6.78E-06    | 0.000261031 | Mpzl2         | myelin protein zero-like 2                                          | 9  | BC015076  |
| 238 | 1431742_at   | 1.06127 | 0.00047495  | 0.00532402  | 1810053B23Rik | RIKEN cDNA 1810053B23 gene                                          | 16 | AK007854  |
| 239 | 1435448_at   | 1.06076 | 1.57E-07    | 1.88E-05    | Bcl2l11       | BCL2-like 11 (apoptosis facilitator)                                | 2  | BM120925  |
| 240 | 1424977_at   | 1.05949 | 8.60E-07    | 6.24E-05    | Lrrc67        | leucine rich repeat containing 67                                   | 1  | BC022722  |
| 241 | 1416773_at   | 1.05865 | 0.000146691 | 0.00226229  | Wee1          | WEE 1 homolog 1 (S. pombe)                                          | 7  | NM_009516 |
| 242 | 1440443_at   | 1.05315 | 0.000205332 | 0.00290257  | E030016H06Rik | RIKEN cDNA E030016H06 gene                                          | 2  | BB531351  |
| 243 | 1426600_at   | 1.0504  | 0.000239496 | 0.00325713  | Slc2a1        | solute carrier family 2 (facilitated glucose transporter), member 1 | 4  | BM209618  |
| 244 | 1436590_at   | 1.04631 | 0.0138275   | 0.0623195   | Ppp1r3b       | protein phosphatase 1, regulatory (inhibitor) subunit 3B            | 8  | BG071940  |
| 245 | 1455345_at   | 1.04372 | 2.18E-05    | 0.000576521 | Phf15         | PHD finger protein 15                                               | 11 | BI663145  |
| 246 | 1448330_at   | 1.04092 | 2.18E-12    | 9.13E-09    | Gstm1         | glutathione S-transferase, mu 1                                     | 3  | NM_010358 |
| 247 | 1433757_a_at | 1.03951 | 5.60E-05    | 0.00114854  | Nisch         | nischarin                                                           | 14 | BB025231  |
| 248 | 1460196_at   | 1.03848 | 2.47E-06    | 0.000128058 | Cbr1          | carbonyl reductase 1                                                | 16 | NM_007620 |
| 249 | 1437100_x_at | 1.03754 | 0.00379066  | 0.0245522   | Pim3          | proviral integration site 3                                         | 15 | BB206220  |
| 250 | 1435483_x_at | 1.03657 | 3.45E-05    | 0.000813381 | Slc25a32      | solute carrier family 25, member 32                                 | 15 | AI662800  |
| 251 | 1431339_a_at | 1.03517 | 6.12E-07    | 4.86E-05    | Efhd2         | EF hand domain containing 2                                         | 4  | AK007560  |
| 252 | 1439830_at   | 1.03457 | 6.66E-09    | 2.07E-06    | Map3k5        | mitogen-activated protein kinase kinase kinase 5                    | 10 | AV377656  |
| 253 | 1427866_x_at | 1.03426 | 0.000772769 | 0.00760365  |               |                                                                     |    | AF071431  |
| 254 | 1449322_at   | 1.03392 | 3.89E-09    | 1.37E-06    |               |                                                                     |    | BC003761  |
| 255 | 1434153_at   | 1.03354 | 0.000231641 | 0.00317369  | Shb           | src homology 2 domain-containing transforming protein B             | 4  | BI408715  |
| 256 | 1454078_a_at | 1.03329 | 5.51E-06    | 0.000225778 | Gal3st1       | galactose-3-O-sulfotransferase 1                                    | 11 | AK002510  |
| 257 | 1425150_at   | 1.02869 | 0.0210283   | 0.0843032   | Acnat2        | acyl-coenzyme A amino acid N-acyltransferase 2                      | 4  | BC010829  |
| 258 | 1439630_x_at | 1.02828 | 3.22E-07    | 3.07E-05    | Sbsn          | suprabasin                                                          | 7  | AI844734  |

|     |              |          |             |             |               |                                                                          |    |           |
|-----|--------------|----------|-------------|-------------|---------------|--------------------------------------------------------------------------|----|-----------|
| 259 | 1419758_at   | 1.02692  | 0.00194377  | 0.0151198   | Abcb1a        | ATP-binding cassette, sub-family B (MDR/TAP), member 1A                  | 5  | M30697    |
| 260 | 1460672_at   | 1.0257   | 3.55E-07    | 3.26E-05    | 2410002F23Rik | RIKEN cDNA 2410002F23 gene                                               | 7  | BC016099  |
| 261 | 1422670_at   | 1.02382  | 2.75E-10    | 2.30E-07    | Rnd2          | Rho family GTPase 2                                                      | 11 | NM_009708 |
| 262 | 1460259_s_at | 1.02365  | 7.38E-06    | 0.000275414 |               |                                                                          |    | AF108501  |
| 263 | 1428143_a_at | 1.02135  | 2.98E-08    | 6.02E-06    | Pnpla2        | patatin-like phospholipase domain containing 2                           | 7  | AK003207  |
| 264 | 1422570_at   | 1.01773  | 8.23E-06    | 0.000297865 | Yy1           | YY1 transcription factor                                                 | 12 | BI665246  |
| 265 | 1443673_x_at | 1.01632  | 0.0017094   | 0.0136967   |               |                                                                          |    | BB710847  |
| 266 | 1435860_at   | 1.01186  | 1.58E-06    | 9.42E-05    | Slc5a6        | solute carrier family 5 (sodium-dependent vitamin transporter), member 6 | 5  | BF450030  |
| 267 | 1448529_at   | 1.01055  | 0.00676752  | 0.0375003   | Thbd          | thrombomodulin                                                           | 2  | NM_009378 |
| 268 | 1416258_at   | 1.00416  | 1.77E-07    | 2.00E-05    | Tk1           | thymidine kinase 1                                                       | 11 | NM_009387 |
| 269 | 1431334_a_at | 1.00153  | 4.67E-07    | 3.93E-05    | 4933433P14Rik | RIKEN cDNA 4933433P14 gene                                               | 12 | AK017049  |
| 270 | 1457123_at   | 1.00041  | 0.00829539  | 0.0432358   | Nrg4          | neuregulin 4                                                             | 9  | BB219343  |
| 271 | 1418322_at   | -1.0001  | 6.93E-05    | 0.00134376  | Crem          | cAMP responsive element modulator                                        | 18 | AI467599  |
| 272 | 1417963_at   | -1.00075 | 0.000401977 | 0.0047387   | Pltp          | phospholipid transfer protein                                            | 2  | NM_011125 |
| 273 | 1419123_a_at | -1.00127 | 9.84E-05    | 0.00170288  | Pdgcfc        | platelet-derived growth factor, C polypeptide                            | 3  | NM_019971 |
| 274 | 1440226_at   | -1.00668 | 8.09E-07    | 5.97E-05    | Zfp760        | zinc finger protein 760                                                  | 17 | BB088782  |
| 275 | 1428083_at   | -1.00697 | 0.00649208  | 0.0363244   | Neat1         | nuclear paraspeckle assembly transcript 1 (non-protein coding)           | 19 | AK018202  |
| 276 | 1439831_at   | -1.00915 | 1.21E-08    | 3.09E-06    |               |                                                                          |    | AW111920  |
| 277 | 1435775_at   | -1.01008 | 4.05E-06    | 0.000181828 | Clock         | circadian locomotor output cycles kaput                                  | 5  | BQ173970  |
| 278 | 1437939_s_at | -1.0103  | 0.000214367 | 0.00299399  | Ctsc          | cathepsin C                                                              | 7  | BM237633  |
| 279 | 1451485_at   | -1.01483 | 8.58E-06    | 0.000307296 | Luc7l3        | LUC7-like 3 ( <i>S. cerevisiae</i> )                                     | 11 | AW536179  |
| 280 | 1425241_a_at | -1.01557 | 0.000972505 | 0.00909615  | Wsb1          | WD repeat and SOCS box-containing 1                                      | 11 | BC019601  |
| 281 | 1422537_a_at | -1.01718 | 0.00467967  | 0.028645    | Id2           | inhibitor of DNA binding 2                                               | 12 | NM_010496 |
| 282 | 1434129_s_at | -1.0178  | 0.000340807 | 0.00422077  | Lhfpl2        | lipoma HMGIC fusion partner-like 2                                       | 13 | BG917242  |
| 283 | 1451730_at   | -1.02189 | 3.13E-06    | 0.00015139  | Zfp62         | zinc finger protein 62                                                   | 11 | BC022935  |
| 284 | 1423797_at   | -1.02266 | 0.0133131   | 0.0606402   | Aacs          | acetoacetyl-CoA synthetase                                               | 5  | BC026817  |
| 285 | 1455182_at   | -1.02326 | 5.27E-05    | 0.00109321  | Kif1b         | kinesin family member 1B                                                 | 4  | AV104668  |
| 286 | 1423569_at   | -1.02359 | 3.08E-06    | 0.000150088 | Gatm          | glycine amidinotransferase (L-arginine:glycine amidinotransferase)       | 2  | AW108522  |
| 287 | 1455025_at   | -1.02775 | 3.86E-06    | 0.0001746   | Paqr9         | progesterin and adipoQ receptor family member IX                         | 9  | AV103696  |
| 288 | 1448080_at   | -1.03073 | 0.000259275 | 0.00344624  |               |                                                                          |    | AI256288  |
| 289 | 1448183_a_at | -1.04068 | 4.28E-06    | 0.00018962  | Hif1a         | hypoxia inducible factor 1, alpha subunit                                | 12 | BB269715  |
| 290 | 1424022_at   | -1.04158 | 0.00355198  | 0.0234257   | Osgin1        | oxidative stress induced growth inhibitor 1                              | 8  | BC022135  |
| 291 | 1417792_at   | -1.04447 | 3.64E-06    | 0.000167038 | Zfml          | zinc finger, matrin-like                                                 | 6  | BM238431  |
| 292 | 1437773_x_at | -1.04661 | 7.39E-08    | 1.12E-05    |               |                                                                          |    | BB476615  |
| 293 | 1435194_at   | -1.0501  | 3.08E-07    | 2.98E-05    | Hspa4         | heat shock protein 4                                                     | 11 | AW909503  |
| 294 | 1455961_at   | -1.05147 | 4.84E-06    | 0.000205897 |               |                                                                          |    | AV174022  |
| 295 | 1436550_at   | -1.05163 | 0.000153154 | 0.00234101  | Fbxo30        | F-box protein 30                                                         | 10 | BB706685  |
| 296 | 1422533_at   | -1.05378 | 0.00147648  | 0.012354    | Cyp51         | cytochrome P450, family 51                                               | 5  | NM_020010 |
| 297 | 1424375_s_at | -1.05455 | 3.81E-05    | 0.000866233 | Gimap4        | GTPase, IMAP family member 4                                             | 6  | BC005577  |
| 298 | 1438596_at   | -1.05652 | 0.000557487 | 0.00601897  |               |                                                                          |    | AW114007  |

|     |              |          |             |             |               |                                                             |    |           |
|-----|--------------|----------|-------------|-------------|---------------|-------------------------------------------------------------|----|-----------|
| 299 | 1450988_at   | -1.05888 | 8.05E-05    | 0.00148019  | Lgr5          | leucine rich repeat containing G protein coupled receptor 5 | 10 | BB751088  |
| 300 | 1436186_at   | -1.06    | 0.0153597   | 0.0671945   | E2f8          | E2F transcription factor 8                                  | 7  | BM247465  |
| 301 | 1428230_at   | -1.06403 | 2.04E-05    | 0.000553679 | Prkd3         | protein kinase D3                                           | 17 | BF160591  |
| 302 | 1452338_s_at | -1.067   | 1.43E-06    | 8.85E-05    | Itsn1         | intersectin 1 (SH3 domain protein 1A)                       | 16 | AA172344  |
| 303 | 1455037_at   | -1.07071 | 1.35E-06    | 8.51E-05    | Plxna2        | plexin A2                                                   | 1  | BB002869  |
| 304 | 1416403_at   | -1.07115 | 1.04E-07    | 1.46E-05    | Abcb10        | ATP-binding cassette, sub-family B (MDR/TAP), member 10     | 8  | AV382118  |
| 305 | 1420886_a_at | -1.07323 | 2.45E-07    | 2.56E-05    | Xbp1          | X-box binding protein 1                                     | 11 | NM_013842 |
| 306 | 1443783_x_at | -1.07588 | 0.00787792  | 0.0416813   | H2-Aa         | histocompatibility 2, class II antigen A, alpha             | 17 | AV086906  |
| 307 | 1452349_x_at | -1.07764 | 2.43E-06    | 0.000127348 |               | AI481797                                                    |    |           |
| 308 | 1425206_a_at | -1.07948 | 6.68E-07    | 5.19E-05    | Ube3a         | ubiquitin protein ligase E3A                                | 7  | BB224620  |
| 309 | 1456328_at   | -1.08006 | 5.71E-05    | 0.00116521  | Bank1         | B-cell scaffold protein with ankyrin repeats 1              | 3  | AI451642  |
| 310 | 1423078_a_at | -1.08079 | 0.000673675 | 0.00685656  | Sc4mol        | sterol-C4-methyl oxidase-like                               | 8  | AK005441  |
| 311 | 1448944_at   | -1.08196 | 2.59E-06    | 0.00013215  | Nrp1          | neuropilin 1                                                | 8  | AK011144  |
| 312 | 1425028_a_at | -1.08286 | 0.000392275 | 0.00465174  | Tpm2          | tropomyosin 2, beta                                         | 4  | BC024358  |
| 313 | 1436169_at   | -1.08392 | 1.58E-08    | 3.75E-06    | C730029A08Rik | RIKEN cDNA C730029A08 gene                                  | 9  | BB428892  |
| 314 | 1440890_a_at | -1.084   | 9.33E-06    | 0.000321936 | Zfp809        | zinc finger protein 809                                     | 9  | BQ176399  |
| 315 | 1425343_at   | -1.08497 | 1.76E-05    | 0.000497353 | Hdhd3         | haloacid dehalogenase-like hydrolase domain containing 3    | 4  | BC003491  |
| 316 | 1433901_at   | -1.0864  | 7.92E-05    | 0.00146213  | Caprin1       | cell cycle associated protein 1                             | 2  | AV301998  |
| 317 | 1450743_s_at | -1.08681 | 1.27E-05    | 0.000396326 | Syncrip       | synaptotagmin binding, cytoplasmic RNA interacting protein  | 9  | BG920261  |
| 318 | 1424303_at   | -1.08763 | 1.88E-05    | 0.00052002  | Depdc7        | DEP domain containing 7                                     | 2  | BC013499  |
| 319 | 1426278_at   | -1.08831 | 0.000121836 | 0.00198392  | Ifi2712a      | interferon, alpha-inducible protein 27 like 2A              | 12 | AY090098  |
| 320 | 1435692_at   | -1.08881 | 1.13E-08    | 2.96E-06    | Kctd21        | potassium channel tetramerisation domain containing 21      | 7  | BQ176086  |
| 321 | 1451721_a_at | -1.08919 | 0.00224645  | 0.0167325   | H2-Ab1        | histocompatibility 2, class II antigen A, beta 1            | 17 | M15848    |
| 322 | 1433623_at   | -1.09842 | 3.13E-11    | 5.10E-08    | Zfp367        | zinc finger protein 367                                     | 13 | BE629588  |
| 323 | 1460256_at   | -1.10041 | 2.27E-06    | 0.000121799 | Car3          | carbonic anhydrase 3                                        | 3  | NM_007606 |
| 324 | 1430893_at   | -1.10151 | 2.27E-06    | 0.000121799 | Mup10         | major urinary protein 10                                    | 4  | AK011413  |
| 325 | 1457883_at   | -1.1059  | 3.54E-06    | 0.000164439 |               | BB225963                                                    |    |           |
| 326 | 1442082_at   | -1.10715 | 5.84E-07    | 4.66E-05    | C3ar1         | complement component 3a receptor 1                          | 6  | BB333624  |
| 327 | 1459141_at   | -1.10729 | 1.97E-06    | 0.000110259 | 1810008I18Rik | RIKEN cDNA 1810008I18 gene                                  | 7  | BB667838  |
| 328 | 1448754_at   | -1.11641 | 0.00045235  | 0.00515349  | Rbp1          | retinol binding protein 1, cellular                         | 9  | NM_011254 |
| 329 | 1449931_at   | -1.11852 | 1.15E-05    | 0.000372975 | Cpeb4         | cytoplasmic polyadenylation element binding protein 4       | 11 | NM_026252 |
| 330 | 1451753_at   | -1.12021 | 4.49E-09    | 1.53E-06    | Plxna2        | plexin A2                                                   | 1  | D86949    |
| 331 | 1422769_at   | -1.12956 | 9.56E-05    | 0.00166512  | Syncrip       | synaptotagmin binding, cytoplasmic RNA interacting protein  | 9  | BG920261  |
| 332 | 1426464_at   | -1.13123 | 0.00107735  | 0.00980696  | Nr1d1         | nuclear receptor subfamily 1, group D, member 1             | 11 | W13191    |
| 333 | 1429006_s_at | -1.13198 | 3.39E-06    | 0.000159398 | 2610110G12Rik | RIKEN cDNA 2610110G12 gene                                  | 17 | AK011838  |
| 334 | 1439300_at   | -1.13275 | 0.000203872 | 0.00288872  | Chic1         | cysteine-rich hydrophobic domain 1                          | X  | BG065782  |
| 335 | 1437864_at   | -1.13314 | 3.68E-06    | 0.000168105 | Adipor2       | adiponectin receptor 2                                      | 6  | BE632137  |
| 336 | 1425993_a_at | -1.13642 | 0.00226228  | 0.0168204   | Hsph1         | heat shock 105kDa/110kDa protein 1                          | 5  | D67017    |

|     |              |          |             |             |               |                                                             |              |
|-----|--------------|----------|-------------|-------------|---------------|-------------------------------------------------------------|--------------|
| 337 | 1443505_at   | -1.13676 | 3.27E-06    | 0.000156079 |               |                                                             | BE651535     |
| 338 | 1452374_at   | -1.14305 | 2.46E-08    | 5.37E-06    | Zfp322a       | zinc finger protein 322A                                    | 13 BB315154  |
| 339 | 1437085_at   | -1.15306 | 0.00011634  | 0.00191892  | D630039A03Rik | RIKEN cDNA D630039A03 gene                                  | 4 AV370040   |
| 340 | 1431900_a_at | -1.16145 | 3.16E-06    | 0.000152167 | Foxa3         | forkhead box A3                                             | 7 AK019022   |
| 341 | 1454617_at   | -1.1616  | 0.0209753   | 0.084275    | Arrdc3        | arrestin domain containing 3                                | 13 BG072824  |
| 342 | 1428229_at   | -1.17543 | 2.28E-06    | 0.000122311 | Prkd3         | protein kinase D3                                           | 17 BF160591  |
| 343 | 1429772_at   | -1.17811 | 7.20E-08    | 1.10E-05    | Plxna2        | plexin A2                                                   | 1 BB085537   |
| 344 | 1453552_at   | -1.17887 | 2.17E-05    | 0.00057625  | 2310014F07Rik | RIKEN cDNA 2310014F07 gene                                  | 9 AK009336   |
| 345 | 1436387_at   | -1.17897 | 3.02E-05    | 0.000738195 | C330006P03Rik | RIKEN cDNA C330006P03 gene                                  | 13 BB398124  |
| 346 | 1442367_at   | -1.18929 | 1.17E-05    | 0.000375708 | Atp11c        | ATPase, class VI, type 11C                                  | X BB184010   |
| 347 | 1439837_at   | -1.19241 | 3.21E-08    | 6.27E-06    | Gigyf2        | GRB10 interacting GYF protein 2                             | 1 BE136147   |
| 348 | 1449109_at   | -1.19402 | 0.0225243   | 0.0884059   | Socs2         | suppressor of cytokine signaling 2                          | 10 NM_007706 |
| 349 | 1429184_at   | -1.19557 | 1.52E-05    | 0.000444652 | Gvin1         | GTPase, very large interferon inducible 1                   | 7 BM243571   |
| 350 | 1453286_at   | -1.19932 | 1.86E-07    | 2.07E-05    | Plxna2        | plexin A2                                                   | 1 BB085537   |
| 351 | 1433443_a_at | -1.20603 | 0.000208645 | 0.00293505  | Hmgcs1        | 3-hydroxy-3-methylglutaryl-Coenzyme A synthase 1            | 13 BB705380  |
| 352 | 1423319_at   | -1.20787 | 0.00984526  | 0.0488711   | Hhex          | hematopoietically expressed homeobox                        | 19 AK014111  |
| 353 | 1433444_at   | -1.2089  | 0.000161919 | 0.0024331   | Hmgcs1        | 3-hydroxy-3-methylglutaryl-Coenzyme A synthase 1            | 13 BB705380  |
| 354 | 1444512_at   | -1.21625 | 0.000114292 | 0.00189423  | Arhgap29      | Rho GTPase activating protein 29                            | 3 AI643890   |
| 355 | 1418804_at   | -1.21902 | 5.68E-08    | 9.46E-06    | Sucnr1        | succinate receptor 1                                        | 3 NM_032400  |
| 356 | 1437581_at   | -1.22286 | 6.58E-05    | 0.00129489  | Zfp800        | zinc finger protein 800                                     | 6 AW824355   |
| 357 | 1418930_at   | -1.22642 | 1.54E-07    | 1.86E-05    | Cxcl10        | chemokine (C-X-C motif) ligand 10                           | 5 NM_021274  |
| 358 | 1416022_at   | -1.22712 | 0.00699154  | 0.0383827   | Fabp5         | fatty acid binding protein 5, epidermal                     | 3 BC002008   |
| 359 | 1423045_at   | -1.23045 | 5.14E-08    | 8.81E-06    | Ncbp2         | nuclear cap binding protein subunit 2                       | 16 BE285362  |
| 360 | 1453282_at   | -1.2355  | 1.08E-09    | 5.28E-07    | Cxadr         | coxsackie virus and adenovirus receptor                     | 16 BE824924  |
| 361 | 1423566_a_at | -1.236   | 0.00119481  | 0.0105804   | Hsph1         | heat shock 105kDa/110kDa protein 1                          | 5 BI499717   |
| 362 | 1416149_at   | -1.23634 | 3.62E-05    | 0.000839292 | Olig1         | oligodendrocyte transcription factor 1                      | 16 AB038696  |
| 363 | 1430401_at   | -1.24045 | 4.06E-06    | 0.000181881 | 3110045C21Rik | RIKEN cDNA 3110045C21 gene                                  | 1 AK014177   |
| 364 | 1456898_at   | -1.24294 | 2.12E-11    | 4.43E-08    |               |                                                             | AI426862     |
| 365 | 1456974_at   | -1.24616 | 8.02E-06    | 0.000292593 | Onecut1       | one cut domain, family member 1                             | 9 BG067274   |
| 366 | 1424727_at   | -1.24666 | 4.85E-05    | 0.00102603  | Ccr5          | chemokine (C-C motif) receptor 5                            | 9 D83648     |
| 367 | 1450783_at   | -1.24811 | 3.51E-05    | 0.000823299 | Ifit1         | interferon-induced protein with tetratricopeptide repeats 1 | 19 NM_008331 |
| 368 | 1422144_at   | -1.2492  | 9.10E-05    | 0.00160675  | Inhbe         | inhibin beta E                                              | 10 BC010404  |
| 369 | 1416021_a_at | -1.2502  | 0.00440181  | 0.0273458   |               |                                                             | BC002008     |
| 370 | 1439445_x_at | -1.25157 | 7.05E-08    | 1.09E-05    | Acly          | ATP citrate lyase                                           | 11 AV347837  |
| 371 | 1447543_at   | -1.25498 | 4.28E-06    | 0.00018962  | Wdfy1         | WD repeat and FYVE domain containing 1                      | 1 BB225041   |
| 372 | 1415965_at   | -1.257   | 8.68E-05    | 0.00155977  | Scd1          | stearoyl-Coenzyme A desaturase 1                            | 19 NM_009127 |
| 373 | 1417793_at   | -1.26403 | 6.82E-06    | 0.000261031 | Irgm2         | immunity-related GTPase family M member 2                   | 11 NM_019440 |
| 374 | 1426645_at   | -1.26548 | 0.000657381 | 0.00675406  | Hsp90aa1      | heat shock protein 90, alpha (cytosolic), class A member 1  | 12 AU079047  |
| 375 | 1433445_x_at | -1.26907 | 8.37E-05    | 0.00152306  | Hmgcs1        | 3-hydroxy-3-methylglutaryl-Coenzyme A synthase 1            | 13 BB705380  |
| 376 | 1427347_s_at | -1.26912 | 0.00631388  | 0.0356205   | Tubb2a        | tubulin, beta 2A                                            | 13 BC003475  |



|     |              |          |             |                      |                                                                             |    |           |
|-----|--------------|----------|-------------|----------------------|-----------------------------------------------------------------------------|----|-----------|
| 377 | 1433575_at   | -1.2707  | 0.000391785 | 0.00464969 Sox4      | SRY-box containing gene 4                                                   | 13 | BG083485  |
| 378 | 1431302_a_at | -1.27186 | 1.69E-08    | 3.91E-06 Nudt7       | nudix (nucleoside diphosphate linked moiety X)-<br>type motif 7             | 8  | AK011172  |
| 379 | 1460694_s_at | -1.27416 | 8.71E-10    | 4.64E-07 Svll        | supervillin                                                                 | 18 | BM203457  |
| 380 | 1427356_at   | -1.27567 | 2.50E-06    | 0.000129245 Fam89a   | family with sequence similarity 89, member A                                | 8  | BC023460  |
| 381 | 1417292_at   | -1.2787  | 3.38E-08    | 6.47E-06 Ifi47       | interferon gamma inducible protein 47                                       | 11 | NM_008330 |
| 382 | 1439566_at   | -1.27918 | 0.000152693 | 0.00233579 Gprin3    | GPRIN family member 3                                                       | 6  | BB245373  |
| 383 | 1424842_a_at | -1.28355 | 4.85E-06    | 0.000205897 Arhgap24 | Rho GTPase activating protein 24                                            | 5  | BC025502  |
| 384 | 1420549_at   | -1.28593 | 0.000111628 | 0.0018659 Gbp1       | guanylate binding protein 1                                                 | 3  | NM_010259 |
| 385 | 1450090_at   | -1.29128 | 9.12E-07    | 6.49E-05 Zfp101      | zinc finger protein 101                                                     | 17 | NM_009542 |
| 386 | 1427838_at   | -1.29561 | 0.00102563  | 0.0094625 Tubb2a     | tubulin, beta 2A                                                            | 13 | M28739    |
| 387 | 1437119_at   | -1.30192 | 9.31E-07    | 6.56E-05 Ern1        | endoplasmic reticulum (ER) to nucleus signalling<br>1                       | 11 | BG075179  |
| 388 | 1436576_at   | -1.30662 | 1.65E-05    | 0.000474053 Fam26f   | family with sequence similarity 26, member F                                | 10 | BB239429  |
| 389 | 1422735_at   | -1.31353 | 0.00357989  | 0.023562 Foxq1       | forkhead box Q1                                                             | 13 | NM_008239 |
| 390 | 1450484_a_at | -1.31364 | 2.33E-08    | 5.21E-06 Cmpk2       | cytidine monophosphate (UMP-CMP) kinase 2,<br>mitochondrial                 | 12 | AK004595  |
| 391 | 1416840_at   | -1.31373 | 0.00159641  | 0.0130665 Mid1ip1    | Mid1 interacting protein 1 (gastrulation specific<br>G12-like (zebrafish))  | X  | NM_026524 |
| 392 | 1418507_s_at | -1.32192 | 0.0229558   | 0.089484 Socs2       | suppressor of cytokine signaling 2                                          | 10 | NM_007706 |
| 393 | 1448663_s_at | -1.32257 | 0.00015186  | 0.00232852 Mvd       | mevalonate (diphospho) decarboxylase                                        | 8  | NM_138656 |
| 394 | 1453500_at   | -1.32528 | 2.21E-09    | 9.10E-07 Cyp2u1      | cytochrome P450, family 2, subfamily u,<br>polypeptide 1                    | 3  | AK018458  |
| 395 | 1434135_at   | -1.33059 | 9.04E-10    | 4.65E-07 B3galnt2    | UDP-GalNAc:betaGlcNAc beta 1,3-<br>galactosaminyltransferase, polypeptide 2 | 13 | BB107552  |
| 396 | 1429954_at   | -1.3341  | 2.31E-06    | 0.000123315 Clec4a3  | C-type lectin domain family 4, member a3                                    | 6  | AK014135  |
| 397 | 1416630_at   | -1.33979 | 0.00183703  | 0.014509 Id3         | inhibitor of DNA binding 3                                                  | 4  | NM_008321 |
| 398 | 1419547_at   | -1.3455  | 2.10E-12    | 9.13E-09 Fahd1       | fumarylacetoacetate hydrolase domain containing<br>1                        | 17 | BC026949  |
| 399 | 1438009_at   | -1.34868 | 0.000446293 | 0.0051106            |                                                                             |    | W91024    |
| 400 | 1449514_at   | -1.36235 | 1.62E-08    | 3.79E-06 Grk5        | G protein-coupled receptor kinase 5                                         | 19 | BC019379  |
| 401 | 1418835_at   | -1.36358 | 0.00904333  | 0.0460068 Phlda1     | pleckstrin homology-like domain, family A,<br>member 1                      | 10 | NM_009344 |
| 402 | 1451418_a_at | -1.36857 | 1.00E-06    | 6.95E-05 Spsb4       | splA/ryanodine receptor domain and SOCS box<br>containing 4                 | 9  | BC023083  |
| 403 | 1448724_at   | -1.37539 | 0.00759107  | 0.0406049 Cish       | cytokine inducible SH2-containing protein                                   | 9  | NM_009895 |
| 404 | 1423046_s_at | -1.37545 | 1.35E-10    | 1.58E-07 Ncbp2       | nuclear cap binding protein subunit 2                                       | 16 | BE285362  |
| 405 | 1437756_at   | -1.37679 | 5.11E-05    | 0.00106588 Gimap9    | GTPase, IMAP family member 9                                                | 6  | BF682515  |
| 406 | 1416833_at   | -1.39098 | 9.94E-08    | 1.42E-05 Keg1        | kidney expressed gene 1                                                     | 19 | NM_029550 |
| 407 | 1449844_at   | -1.39135 | 8.55E-05    | 0.00154762 Slco1a1   | solute carrier organic anion transporter family,<br>member 1a1              | 6  | AB031813  |
| 408 | 1449854_at   | -1.39749 | 0.00323317  | 0.0218795 Nr0b2      | nuclear receptor subfamily 0, group B, member 2                             | 4  | BC019540  |
| 409 | 1423418_at   | -1.42692 | 0.000441149 | 0.00507083 Fdps      | farnesyl diphosphate synthetase                                             | 3  | BI247584  |
| 410 | 1420835_at   | -1.43299 | 0.000105662 | 0.00179692 Slc25a30  | solute carrier family 25, member 30                                         | 14 | BB032012  |
| 411 | 1439377_x_at | -1.44668 | 1.49E-05    | 0.000441849 Cdc20    | cell division cycle 20 homolog (S. cerevisiae)                              | 4  | BB041150  |

|     |              |          |             |             |          |                                                                                |    |           |
|-----|--------------|----------|-------------|-------------|----------|--------------------------------------------------------------------------------|----|-----------|
| 412 | 1425270_at   | -1.45057 | 7.30E-05    | 0.00138678  | Kif1b    | kinesin family member 1B                                                       | 4  | BE199508  |
| 413 | 1450779_at   | -1.45638 | 0.000625992 | 0.00651147  | Fabp7    | fatty acid binding protein 7, brain                                            | 10 | NM_021272 |
| 414 | 1416039_x_at | -1.4584  | 0.000123656 | 0.00200407  | Cyr61    | cysteine rich protein 61                                                       | 3  | NM_010516 |
| 415 | 1427301_at   | -1.46166 | 6.33E-07    | 4.96E-05    | Cd48     | CD48 antigen                                                                   | 1  | BE634960  |
| 416 | 1424857_a_at | -1.47824 | 1.15E-07    | 1.54E-05    | Trim34   | tripartite motif-containing 34                                                 | 7  | AF220142  |
| 417 | 1452348_s_at | -1.48071 | 2.59E-06    | 0.00013215  |          |                                                                                |    | AI481797  |
| 418 | 1418496_at   | -1.48426 | 2.12E-06    | 0.00011738  | Foxa1    | forkhead box A1                                                                | 12 | NM_008259 |
| 419 | 1430834_at   | -1.53288 | 0.000121819 | 0.00198392  | Gprin3   | GPRIN family member 3                                                          | 6  | BB359379  |
| 420 | 1450264_a_at | -1.53631 | 1.92E-05    | 0.000530618 | Chka     | choline kinase alpha                                                           | 19 | NM_013490 |
| 421 | 1415993_at   | -1.53923 | 0.000706257 | 0.00711664  | Sqle     | squalene epoxidase                                                             | 15 | NM_009270 |
| 422 | 1438558_x_at | -1.54503 | 0.00537767  | 0.0317936   | Foxq1    | forkhead box Q1                                                                | 13 | AV009267  |
| 423 | 1433446_at   | -1.56976 | 3.45E-06    | 0.000161148 | Hmgcs1   | 3-hydroxy-3-methylglutaryl-Coenzyme A synthase 1                               | 13 | BB705380  |
| 424 | 1423571_at   | -1.58054 | 1.33E-08    | 3.31E-06    | S1pr1    | sphingosine-1-phosphate receptor 1                                             | 3  | BB133079  |
| 425 | 1418652_at   | -1.60313 | 6.03E-05    | 0.00121853  | Cxcl9    | chemokine (C-X-C motif) ligand 9                                               | 5  | NM_008599 |
| 426 | 1423804_a_at | -1.62327 | 0.000195558 | 0.00279797  | Idi1     | isopentenyl-diphosphate delta isomerase                                        | 13 | BC004801  |
| 427 | 1424033_at   | -1.63702 | 3.62E-06    | 0.000166498 | Sfrs7    | splicing factor, arginine/serine-rich 7                                        | 17 | BC014857  |
| 428 | 1423397_at   | -1.64102 | 0.000178864 | 0.00262448  |          |                                                                                |    | AI118428  |
| 429 | 1448698_at   | -1.64964 | 8.91E-11    | 1.14E-07    | Ccnd1    | cyclin D1                                                                      | 7  | NM_007631 |
| 430 | 1438751_at   | -1.654   | 9.20E-06    | 0.000319517 | Slc30a10 | solute carrier family 30, member 10                                            | 1  | BB736474  |
| 431 | 1449009_at   | -1.65632 | 1.13E-05    | 0.000366724 |          |                                                                                |    | NM_011579 |
| 432 | 1433944_at   | -1.6809  | 1.47E-07    | 1.81E-05    | Hectd2   | HECT domain containing 2                                                       | 19 | AV256030  |
| 433 | 1451122_at   | -1.69138 | 5.37E-05    | 0.00110826  | Idi1     | isopentenyl-diphosphate delta isomerase                                        | 13 | BC004801  |
| 434 | 1437453_s_at | -1.70953 | 1.24E-06    | 7.91E-05    | Pcsk9    | proprotein convertase subtilisin/kexin type 9                                  | 4  | AV010795  |
| 435 | 1442537_at   | -1.721   | 5.84E-10    | 3.89E-07    |          |                                                                                |    | BB771206  |
| 436 | 1454842_a_at | -1.74703 | 9.19E-09    | 2.64E-06    | B3galnt2 | UDP-GalNAc:betaGlcNAc beta 1,3-galactosaminyltransferase, polypeptide 2        | 13 | AI853240  |
| 437 | 1435462_at   | -1.78992 | 1.30E-06    | 8.27E-05    | Plcx2    | phosphatidylinositol-specific phospholipase C, X domain containing 2           | 16 | BQ176176  |
| 438 | 1438676_at   | -1.79767 | 5.56E-06    | 0.000227244 | Mpa21    | macrophage activation 2 like                                                   | 5  | BM241485  |
| 439 | 1417419_at   | -1.82335 | 5.52E-11    | 8.51E-08    | Ccnd1    | cyclin D1                                                                      | 7  | NM_007631 |
| 440 | 1455324_at   | -1.82846 | 2.80E-07    | 2.80E-05    | Plcx2    | phosphatidylinositol-specific phospholipase C, X domain containing 2           | 16 | BQ176176  |
| 441 | 1430785_at   | -1.83813 | 3.11E-08    | 6.16E-06    | Sdr9c7   | 4short chain dehydrogenase/reductase family 9C, member 7                       | 10 | BB150587  |
| 442 | 1420379_at   | -1.84103 | 1.09E-06    | 7.30E-05    | Slco1a1  | solute carrier organic anion transporter family, member 1a1                    | 6  | AB031813  |
| 443 | 1447927_at   | -1.86204 | 2.42E-07    | 2.55E-05    | Mpa21    | macrophage activation 2 like                                                   | 5  | BG092512  |
| 444 | 1427513_at   | -1.89121 | 4.73E-10    | 3.41E-07    | BC024137 | cDNA sequence BC024137                                                         | 8  | BI144810  |
| 445 | 1424709_at   | -1.91773 | 2.82E-10    | 2.30E-07    | Sc5d     | sterol-C5-desaturase (fungal ERG3, delta-5-desaturase) homolog (S. cerevisiae) | 9  | AB016248  |
| 446 | 1456074_at   | -1.91916 | 1.17E-07    | 1.55E-05    | Sdr9c7   | 4short chain dehydrogenase/reductase family 9C, member 7                       | 10 | BB143568  |
| 447 | 1430896_s_at | -1.93123 | 7.51E-09    | 2.25E-06    | Nudt7    | nudix (nucleoside diphosphate linked moiety X)-type motif 7                    | 8  | AK008824  |

|     |              |          |             |             |              |                                                                                                    |    |           |
|-----|--------------|----------|-------------|-------------|--------------|----------------------------------------------------------------------------------------------------|----|-----------|
| 448 | 1427422_at   | -1.93675 | 0.00175004  | 0.0139498   | Gm6484       | predicted gene 6484                                                                                | 9  | BM122014  |
| 449 | 1452318_a_at | -1.95598 | 0.00101704  | 0.00941592  | Hspa1b       | heat shock protein 1B                                                                              | 17 | M12573    |
| 450 | 1420836_at   | -1.971   | 9.08E-06    | 0.000318716 | Slc25a30     | solute carrier family 25, member 30                                                                | 14 | BB032012  |
| 451 | 1453588_at   | -1.99988 | 0.00167797  | 0.0135299   | Car3         | carbonic anhydrase 3                                                                               | 3  | BB213876  |
| 452 | 1437073_x_at | -2.004   | 1.02E-05    | 0.000344813 |              |                                                                                                    |    | BB115446  |
| 453 | 1448986_x_at | -2.0871  | 6.52E-09    | 2.06E-06    | Dnase2a      | deoxyribonuclease II alpha                                                                         | 8  | NM_010062 |
| 454 | 1421092_at   | -2.08749 | 4.39E-05    | 0.00095845  | Serpina12    | serine (or cysteine) peptidase inhibitor, clade A (alpha-1 antiproteinase, antitrypsin), member 12 | 12 | AK014346  |
| 455 | 1420722_at   | -2.08772 | 1.06E-06    | 7.21E-05    | Elovl3       | elongation of very long chain fatty acids (FEN1/Elo2, SUR4/Elo3, yeast)-like 3                     | 19 | BC016468  |
| 456 | 1450018_s_at | -2.09056 | 2.73E-05    | 0.000684816 | Slc25a30     | solute carrier family 25, member 30                                                                | 14 | BB032012  |
| 457 | 1427127_x_at | -2.09413 | 0.000472756 | 0.00530755  | Hspa1b       | heat shock protein 1B                                                                              | 17 | M12573    |
| 458 | 1433898_at   | -2.10633 | 4.14E-05    | 0.0009228   |              |                                                                                                    |    | AV000840  |
| 459 | 1450839_at   | -2.16883 | 3.83E-06    | 0.000173563 | D0H4S114     | DNA segment, human D4S114                                                                          | 18 | D45203    |
| 460 | 1427126_at   | -2.218   | 0.000479138 | 0.00535649  | Hspa1b       | heat shock protein 1B                                                                              | 17 | M12573    |
| 461 | 1417420_at   | -2.23435 | 8.44E-14    | 1.04E-09    | Ccnd1        | cyclin D1                                                                                          | 7  | NM_007631 |
| 462 | 1420531_at   | -2.25893 | 7.98E-06    | 0.000291427 | Hsd3b5       | hydroxy-delta-5-steroid dehydrogenase, 3 beta- and steroid delta-isomerase 5                       | 3  | NM_008295 |
| 463 | 1430584_s_at | -2.29317 | 0.000805274 | 0.00786538  | Car3         | carbonic anhydrase 3                                                                               | 3  | BB213876  |
| 464 | 1417065_at   | -2.29922 | 0.00027019  | 0.00355028  | Egr1         | early growth response 1                                                                            | 18 | NM_007913 |
| 465 | 1427981_a_at | -2.37276 | 8.55E-08    | 1.25E-05    | Csad         | cysteine sulfinic acid decarboxylase                                                               | 15 | AY033912  |
| 466 | 1434520_at   | -2.3861  | 4.30E-10    | 3.41E-07    | Sc5d         | sterol-C5-desaturase (fungal ERG3, delta-5-desaturase) homolog (S. cerevisiae)                     | 9  | AU067703  |
| 467 | 1450252_at   | -2.47701 | 0.00224798  | 0.0167396   | Onecut1      | one cut domain, family member 1                                                                    | 9  | NM_008262 |
| 468 | 1431817_at   | -2.50992 | 1.03E-09    | 5.21E-07    | Adh6-ps1     | alcohol dehydrogenase 6 (class V), pseudogene 1                                                    | 3  | AK004863  |
| 469 | 1444296_a_at | -2.67106 | 1.89E-07    | 2.09E-05    | Serpina4-ps1 | serine (or cysteine) peptidase inhibitor, clade A, member 4, pseudogene 1                          | 12 | BF383739  |
| 470 | 1444297_at   | -2.72051 | 6.72E-07    | 5.21E-05    | Serpina4-ps1 | serine (or cysteine) peptidase inhibitor, clade A, member 4, pseudogene 1                          | 12 | BF383739  |
| 471 | 1436736_x_at | -2.89524 | 1.13E-07    | 1.51E-05    | D0H4S114     | DNA segment, human D4S114                                                                          | 18 | BB369191  |
| 472 | 1421447_at   | -2.9253  | 0.000910095 | 0.00864283  |              |                                                                                                    |    | NM_008262 |
| 473 | 1448092_x_at | -3.26883 | 3.86E-08    | 7.21E-06    | Serpina4-ps1 | serine (or cysteine) peptidase inhibitor, clade A, member 4, pseudogene 1                          | 12 | AA267743  |

### SHS<sup>4+1R</sup> vs C

|   | Probeset_id  | Log2Ratio.1 | P.Value     | Adj.P.Value | Symbol | Description                         | Chromosome | GenBank   |
|---|--------------|-------------|-------------|-------------|--------|-------------------------------------|------------|-----------|
| 1 | 1443147_at   | 4.13179     | 1.48E-07    | 7.31E-05    |        |                                     |            | BB505010  |
| 2 | 1426037_a_at | 4.10832     | 2.05E-06    | 0.000297843 | Rgs16  | regulator of G-protein signaling 16 | 1          | U94828    |
| 3 | 1455265_a_at | 3.28591     | 1.02E-06    | 0.000189984 | Rgs16  | regulator of G-protein signaling 16 | 1          | BB100249  |
| 4 | 1417168_a_at | 3.16386     | 6.68E-08    | 5.70E-05    | Usp2   | ubiquitin specific peptidase 2      | 9          | AI553394  |
| 5 | 1422925_s_at | 3.13776     | 3.55E-07    | 0.000109493 | Acot3  | acyl-CoA thioesterase 3             | 12         | NM_134246 |
| 6 | 1417169_at   | 2.7911      | 1.38E-08    | 3.01E-05    | Usp2   | ubiquitin specific peptidase 2      | 9          | AI553394  |
| 7 | 1418288_at   | 1.93146     | 0.000279407 | 0.00705792  | Lpin1  | lipin 1                             | 12         | NM_015763 |

|    |              |         |             |             |          |                                                          |    |           |
|----|--------------|---------|-------------|-------------|----------|----------------------------------------------------------|----|-----------|
| 8  | 1417904_at   | 1.90865 | 1.62E-07    | 7.65E-05    | Dclre1a  | DNA cross-link repair 1A, PSO2 homolog (S. cerevisiae)   | 19 | AF241240  |
| 9  | 1435188_at   | 1.88137 | 3.13E-06    | 0.000377288 | Gm129    | predicted gene 129                                       | 3  | BB407125  |
| 10 | 1426516_a_at | 1.86847 | 0.000345911 | 0.00814782  | Lpin1    | lipin 1                                                  | 12 | AK014526  |
| 11 | 1458040_at   | 1.80034 | 3.43E-06    | 0.000403052 |          |                                                          |    | BM213832  |
| 12 | 1451452_a_at | 1.78544 | 5.18E-07    | 0.000132036 | Rgs16    | regulator of G-protein signaling 16                      | 1  | U72881    |
| 13 | 1428223_at   | 1.74716 | 0.000484327 | 0.0101009   | Mfsd2a   | major facilitator superfamily domain containing 2A       | 4  | AK006096  |
| 14 | 1425824_a_at | 1.72075 | 3.02E-06    | 0.000371298 | Pcsk4    | proprotein convertase subtilisin/kexin type 4            | 10 | D01093    |
| 15 | 1428923_at   | 1.7118  | 0.00189512  | 0.0250365   | Ppp1r3g  | protein phosphatase 1, regulatory (inhibitor) subunit 3G | 13 | AK005570  |
| 16 | 1418174_at   | 1.68441 | 0.0029      | 0.0338145   | Dbp      | D site albumin promoter binding protein                  | 7  | BC018323  |
| 17 | 1425837_a_at | 1.65575 | 0.00353622  | 0.0386348   |          |                                                          |    | AF199491  |
| 18 | 1438211_s_at | 1.65392 | 0.00363457  | 0.0393861   | Dbp      | D site albumin promoter binding protein                  | 7  | BB550183  |
| 19 | 1451548_at   | 1.6416  | 8.62E-05    | 0.00331895  | Upp2     | uridine phosphorylase 2                                  | 2  | BC027189  |
| 20 | 1424969_s_at | 1.62993 | 3.19E-05    | 0.00178615  | Upp2     | uridine phosphorylase 2                                  | 2  | BC027189  |
| 21 | 1422557_s_at | 1.62793 | 0.00480169  | 0.0468997   | Mt1      | metallothionein 1                                        | 8  | NM_013602 |
| 22 | 1416432_at   | 1.60329 | 0.000909886 | 0.0155824   | Pfkfb3   | 6-phosphofructo-2-kinase/fructose-2,6-biphosphatase 3    | 2  | NM_133232 |
| 23 | 1451190_a_at | 1.59469 | 1.02E-06    | 0.000189984 | Sbk1     | SH3-binding kinase 1                                     | 7  | BC025837  |
| 24 | 1422257_s_at | 1.58981 | 0.000763481 | 0.0139126   | Cyp2b10  | cytochrome P450, family 2, subfamily b, polypeptide 10   | 7  | NM_009998 |
| 25 | 1425645_s_at | 1.56264 | 0.000602441 | 0.0117763   | Cyp2b10  | cytochrome P450, family 2, subfamily b, polypeptide 10   | 7  | AF128849  |
| 26 | 1416773_at   | 1.53407 | 1.47E-06    | 0.000236443 | Wee1     | WEE 1 homolog 1 (S. pombe)                               | 7  | NM_009516 |
| 27 | 1417602_at   | 1.50929 | 3.79E-06    | 0.000429376 | Per2     | period homolog 2 (Drosophila)                            | 1  | AF035830  |
| 28 | 1421087_at   | 1.47841 | 1.20E-06    | 0.000212469 | Per3     | period homolog 3 (Drosophila)                            | 4  | NM_011067 |
| 29 | 1449851_at   | 1.46472 | 9.24E-06    | 0.000784202 | Per1     | period homolog 1 (Drosophila)                            | 11 | AF022992  |
| 30 | 1416125_at   | 1.41848 | 1.76E-05    | 0.00122329  | Fkbp5    | FK506 binding protein 5                                  | 17 | U16959    |
| 31 | 1438743_at   | 1.41796 | 0.0378923   | 0.176972    | Cyp7a1   | cytochrome P450, family 7, subfamily a, polypeptide 1    | 4  | BB667338  |
| 32 | 1438431_at   | 1.39891 | 0.00261472  | 0.0313874   | Abcd2    | ATP-binding cassette, sub-family D (ALD), member 2       | 15 | BB197269  |
| 33 | 1423978_at   | 1.39573 | 5.17E-07    | 0.000132036 | Sbk1     | SH3-binding kinase 1                                     | 7  | BC025837  |
| 34 | 1428487_s_at | 1.3825  | 1.37E-05    | 0.00102245  | Coq10b   | coenzyme Q10 homolog B (S. cerevisiae)                   | 1  | AK002294  |
| 35 | 1421681_at   | 1.37335 | 0.000262668 | 0.0067992   | Nrg4     | neuregulin 4                                             | 9  | NM_032002 |
| 36 | 1421830_at   | 1.36272 | 7.76E-08    | 5.70E-05    |          |                                                          |    | NM_009647 |
| 37 | 1425646_at   | 1.35743 | 0.000129729 | 0.00426156  | BC016495 | cDNA sequence BC016495                                   | 19 | BC016495  |
| 38 | 1456812_at   | 1.35119 | 6.01E-06    | 0.000580985 | Abcd2    | ATP-binding cassette, sub-family D (ALD), member 2       | 15 | AW456685  |
| 39 | 1424175_at   | 1.34108 | 1.39E-07    | 7.03E-05    | Tef      | thyrotroph embryonic factor                              | 15 | BC017689  |
| 40 | 1451787_at   | 1.33535 | 0.000902184 | 0.015513    | Cyp2b10  | cytochrome P450, family 2, subfamily b, polypeptide 10   | 7  | AF128849  |
| 41 | 1460510_a_at | 1.33523 | 6.32E-06    | 0.00059463  | Coq10b   | coenzyme Q10 homolog B (S. cerevisiae)                   | 1  | AK006551  |
| 42 | 1419874_x_at | 1.31674 | 0.0264209   | 0.141507    | Zbtb16   | zinc finger and BTB domain containing 16                 | 9  | AA419994  |

|    |              |         |             |             |               |              |
|----|--------------|---------|-------------|-------------|---------------|--------------|
| 43 | 1442025_a_at | 1.31194 | 0.0430913   | 0.191439    |               | AI467657     |
| 44 | 1429206_at   | 1.291   | 8.53E-06    | 0.000742801 | Rhobtb1       | 10 AK014194  |
| 45 | 1416933_at   | 1.27923 | 5.27E-08    | 5.52E-05    | Por           | 5 NM_008898  |
| 46 | 1431339_a_at | 1.26585 | 2.91E-08    | 4.06E-05    | Efh2          | 4 AK007560   |
| 47 | 1440840_at   | 1.25735 | 3.98E-07    | 0.00011675  | D630004K10Rik | 10 BB335455  |
| 48 | 1457123_at   | 1.24919 | 0.0015803   | 0.0222453   | Nrg4          | 9 BB219343   |
| 49 | 1424815_at   | 1.24368 | 8.35E-07    | 0.000179812 | Gys2          | 6 BC021322   |
| 50 | 1431806_at   | 1.23182 | 0.000129312 | 0.00425265  | 4931408D14Rik | 19 AK016444  |
| 51 | 1425895_a_at | 1.21944 | 0.00571114  | 0.0524273   | Id1           | 2 U43884     |
| 52 | 1449565_at   | 1.20857 | 2.40E-05    | 0.00153427  | Cyp2g1        | 7 NM_013809  |
| 53 | 1435860_at   | 1.20395 | 1.25E-07    | 6.67E-05    | Slc5a6        | 5 BF450030   |
| 54 | 1450387_s_at | 1.20374 | 1.34E-06    | 0.000224272 |               | NM_009647    |
| 55 | 1459145_at   | 1.17624 | 3.22E-06    | 0.000383336 | A930033H14Rik | 10 BB483368  |
| 56 | 1448506_at   | 1.16525 | 1.40E-08    | 3.01E-05    | Serpina6      | 12 NM_007618 |
| 57 | 1421852_at   | 1.15865 | 0.0032186   | 0.0364136   | Kcnk5         | 14 AF319542  |
| 58 | 1416029_at   | 1.15512 | 0.0248502   | 0.136003    | Klf10         | 15 NM_013692 |
| 59 | 1453416_at   | 1.1488  | 3.51E-05    | 0.00190256  | Gas2l3        | 10 BE199211  |
| 60 | 1437478_s_at | 1.13859 | 1.95E-09    | 1.84E-05    | Efh2          | 4 AA409309   |
| 61 | 1429809_at   | 1.12689 | 8.29E-08    | 5.70E-05    | Tmtc2         | 10 AK018506  |
| 62 | 1452416_at   | 1.12497 | 2.79E-05    | 0.00165706  | Il6ra         | 3 X53802     |
| 63 | 1452841_at   | 1.12269 | 3.59E-06    | 0.000417195 | Pgm2l1        | 7 BG073164   |
| 64 | 1448568_a_at | 1.11232 | 3.04E-05    | 0.00173341  | Slc20a1       | 2 NM_015747  |
| 65 | 1448978_at   | 1.10778 | 9.06E-08    | 5.70E-05    | Ngef          | 1 NM_019867  |
| 66 | 1448162_at   | 1.10062 | 4.45E-05    | 0.00218559  | Vcam1         | 3 BB250384   |
| 67 | 1423797_at   | 1.09312 | 0.00881556  | 0.0700791   | Aacs          | 5 BC026817   |
| 68 | 1432543_a_at | 1.07722 | 6.99E-06    | 0.000642075 | Klf13         | 7 AK002926   |
| 69 | 1434442_at   | 1.0752  | 3.18E-06    | 0.000379801 | Stbd1         | 5 BB667844   |
| 70 | 1460258_at   | 1.07517 | 5.70E-05    | 0.00254201  | Lect1         | 14 NM_010701 |
| 71 | 1433858_at   | 1.07355 | 0.000950158 | 0.0160841   | Lrrc28        | 7 BB667092   |
| 72 | 1417761_at   | 1.07345 | 0.000143618 | 0.00454951  | Apoa4         | 9 BC010769   |
| 73 | 1419758_at   | 1.06699 | 0.00140976  | 0.0206434   | Abcb1a        | 5 M30697     |
| 74 | 1448666_s_at | 1.05889 | 0.000125375 | 0.00415582  | Tob2          | 15 AV174616  |
| 75 | 1449519_at   | 1.05401 | 0.0155885   | 0.1009      | Gadd45a       | 6 NM_007836  |
| 76 | 1426288_at   | 1.04805 | 2.32E-07    | 8.93E-05    | Lrp4          | 2 AF247637   |
| 77 | 1435459_at   | 1.04439 | 0.00144658  | 0.0209954   | Fmo2          | 1 BM936480   |
| 78 | 1450188_s_at | 1.03825 | 0.0264348   | 0.141556    | Lipg          | 18 BC020991  |
| 79 | 1434437_x_at | 1.027   | 0.00245673  | 0.0300281   | Rrm2          | 12 AV301324  |
| 80 | 1439189_at   | 1.0258  | 0.000180086 | 0.00531407  | Fnip2         | 3 BB498793   |
| 81 | 1448902_at   | 1.02535 | 6.37E-05    | 0.00274851  | Ttc23         | 7 NM_025905  |

|     |              |          |             |             |               |                                                                                |             |
|-----|--------------|----------|-------------|-------------|---------------|--------------------------------------------------------------------------------|-------------|
| 82  | 1455665_at   | 1.02488  | 0.000366413 | 0.00851438  |               |                                                                                | BB705689    |
| 83  | 1422077_at   | 1.00637  | 7.62E-06    | 0.000685167 | Acot4         | acyl-CoA thioesterase 4                                                        | 12 AA571017 |
| 84  | 1422230_s_at | 1.00571  | 2.56E-07    | 9.51E-05    |               |                                                                                | NM_007812   |
| 85  | 1423214_at   | -1.00129 | 9.15E-05    | 0.00344627  | Plxnc1        | plexin C1                                                                      | 10 BB476707 |
| 86  | 1460426_at   | -1.0025  | 1.59E-07    | 7.65E-05    | Pde4dip       | phosphodiesterase 4D interacting protein (myomegalin)                          | 3 AI639670  |
| 87  | 1432539_a_at | -1.00312 | 1.30E-05    | 0.000995262 | Nup54         | nucleoporin 54                                                                 | 5 AK014260  |
| 88  | 1453286_at   | -1.00522 | 2.36E-06    | 0.000324077 | Plxna2        | plexin A2                                                                      | 1 BB085537  |
| 89  | 1449928_at   | -1.00966 | 1.36E-07    | 6.98E-05    | Dynlt3        | dynein light chain Tctex-type 3                                                | X NM_025975 |
| 90  | 1421035_a_at | -1.0108  | 5.55E-08    | 5.56E-05    | Magi3         | membrane associated guanylate kinase, WW and PDZ domain containing 3           | 3 BB329638  |
| 91  | 1422474_at   | -1.01265 | 0.00092442  | 0.0157485   | Pde4b         | phosphodiesterase 4B, cAMP specific                                            | 4 BM246564  |
| 92  | 1417831_at   | -1.01526 | 4.52E-07    | 0.000121643 | Smc1a         | structural maintenance of chromosomes 1A                                       | X BB156359  |
| 93  | 1438403_s_at | -1.01803 | 0.0052635   | 0.0496559   | Malat1        | metastasis associated lung adenocarcinoma transcript 1 (non-coding RNA)        | 19 BF537798 |
| 94  | 1416403_at   | -1.01959 | 2.19E-07    | 8.93E-05    | Abcb10        | ATP-binding cassette, sub-family B (MDR/TAP), member 10                        | 8 AV382118  |
| 95  | 1416530_a_at | -1.02109 | 1.21E-07    | 6.57E-05    |               |                                                                                | BC003788    |
| 96  | 1422528_a_at | -1.02178 | 0.000369504 | 0.00853881  | Zfp3611       | zinc finger protein 36, C3H type-like 1                                        | 12 M58566   |
| 97  | 1436545_at   | -1.02586 | 4.43E-06    | 0.00047586  | Dtx4          | deltex 4 homolog (Drosophila)                                                  | 19 AV017487 |
| 98  | 1427319_at   | -1.02616 | 4.32E-07    | 0.000119478 | A230046K03Rik | RIKEN cDNA A230046K03 gene                                                     | 10 AI607603 |
| 99  | 1427488_a_at | -1.02886 | 0.000187447 | 0.00543831  | Birc6         | baculoviral IAP repeat-containing 6                                            | 17 BC026990 |
| 100 | 1430053_a_at | -1.0298  | 1.21E-08    | 3.01E-05    | Ola1          | Obg-like ATPase 1                                                              | 2 AK019142  |
| 101 | 1436746_at   | -1.02995 | 9.87E-07    | 0.000189984 | Wnk1          | WNK lysine deficient protein kinase 1                                          | 6 BI692255  |
| 102 | 1427826_a_at | -1.03382 | 2.08E-05    | 0.00138023  | Slco1b2       | solute carrier organic anion transporter family, member 1b2                    | 6 AB037192  |
| 103 | 1451018_at   | -1.03427 | 1.21E-08    | 3.01E-05    | Leprotl1      | leptin receptor overlapping transcript-like 1                                  | 8 BF658789  |
| 104 | 1437901_a_at | -1.03431 | 1.79E-07    | 8.33E-05    | Vps41         | vacuolar protein sorting 41 (yeast)                                            | 13 BM240052 |
| 105 | 1455930_at   | -1.03458 | 0.000142997 | 0.00453475  |               |                                                                                | BI651113    |
| 106 | 1453259_at   | -1.038   | 4.16E-05    | 0.0020897   | Insc          | inscuteable homolog (Drosophila)                                               | 7 BB667513  |
| 107 | 1431056_a_at | -1.03933 | 8.25E-05    | 0.00320132  | Lpl           | lipoprotein lipase                                                             | 8 AK017272  |
| 108 | 1421230_a_at | -1.04054 | 2.90E-06    | 0.000361233 | Msi2          | Musashi homolog 2 (Drosophila)                                                 | 11 BI696168 |
| 109 | 1422155_at   | -1.04239 | 0.000437138 | 0.00949519  | Hist2h3c2     | histone cluster 2, H3c2                                                        | 3 BC015270  |
| 110 | 1425206_a_at | -1.04279 | 1.09E-06    | 0.00020027  | Ube3a         | ubiquitin protein ligase E3A                                                   | 7 BB224620  |
| 111 | 1456319_at   | -1.04302 | 0.000290092 | 0.00724856  |               |                                                                                | BG065719    |
| 112 | 1454633_at   | -1.04495 | 1.63E-06    | 0.000255    | Etnk1         | ethanolamine kinase 1                                                          | 6 BG066916  |
| 113 | 1418603_at   | -1.04588 | 0.00145835  | 0.0211025   | Avpr1a        | arginine vasopressin receptor 1A                                               | 10 D49729   |
| 114 | 1424709_at   | -1.04649 | 3.46E-06    | 0.000405096 | Sc5d          | sterol-C5-desaturase (fungal ERG3, delta-5-desaturase) homolog (S. cerevisiae) | 9 AB016248  |
| 115 | 1417028_a_at | -1.0587  | 9.57E-09    | 3.01E-05    | Trim2         | tripartite motif-containing 2                                                  | 3 BB283676  |
| 116 | 1418227_at   | -1.05992 | 4.83E-07    | 0.000126367 | Orc2l         | origin recognition complex, subunit 2-like (S. cerevisiae)                     | 1 BB830976  |
| 117 | 1456120_at   | -1.06041 | 2.12E-07    | 8.93E-05    | Secisbp2l     | SECIS binding protein 2-like                                                   | 2 BB427489  |
| 118 | 1415988_at   | -1.06177 | 7.85E-05    | 0.00311707  | Hdlbp         | high density lipoprotein (HDL) binding protein                                 | 1 BG065877  |
| 119 | 1431098_at   | -1.06491 | 2.22E-05    | 0.00143469  | Clip1         | CAP-GLY domain containing linker protein 1                                     | 5 AK014540  |

|     |              |          |             |             |               |                                                                         |    |           |
|-----|--------------|----------|-------------|-------------|---------------|-------------------------------------------------------------------------|----|-----------|
| 120 | 1418660_at   | -1.07041 | 3.56E-08    | 4.35E-05    | Clock         | circadian locomoter output cycles kaput                                 | 5  | BB203106  |
| 121 | 1427430_at   | -1.07095 | 7.76E-05    | 0.00309929  | AI848100      | expressed sequence AI848100                                             | 1  | BB148987  |
| 122 | 1436931_at   | -1.07621 | 0.0033143   | 0.0370246   | Rfx4          | regulatory factor X, 4 (influences HLA class II expression)             | 10 | AV255458  |
| 123 | 1453414_at   | -1.07795 | 0.000126051 | 0.00416879  | Ypel2         | yippee-like 2 (Drosophila)                                              | 11 | BB133023  |
| 124 | 1434644_at   | -1.07848 | 3.47E-05    | 0.0018842   | Tb1lx         | transducin (beta)-like 1 X-linked                                       | X  | BF682509  |
| 125 | 1434282_at   | -1.08226 | 4.94E-06    | 0.000511639 | Ibtk          | inhibitor of Bruton agammaglobulinemia tyrosine kinase                  | 9  | BM250711  |
| 126 | 1417623_at   | -1.08336 | 0.000215781 | 0.00592579  | Slc12a2       | solute carrier family 12, member 2                                      | 18 | BG069505  |
| 127 | 1449578_at   | -1.08514 | 0.00509463  | 0.0485823   | Supt16h       | suppressor of Ty 16 homolog (S. cerevisiae)                             | 14 | AW536705  |
| 128 | 1422741_a_at | -1.08693 | 1.64E-05    | 0.00115734  | Bbx           | bobby sox homolog (Drosophila)                                          | 16 | BF319769  |
| 129 | 1455293_at   | -1.08899 | 3.21E-07    | 0.000106211 | Leo1          | Leo1, Paf1/RNA polymerase II complex component, homolog (S. cerevisiae) | 9  | BG065311  |
| 130 | 1456088_at   | -1.09327 | 1.85E-06    | 0.000276462 | Xiap          | X-linked inhibitor of apoptosis                                         | X  | BF134200  |
| 131 | 1431212_a_at | -1.09731 | 9.79E-08    | 5.74E-05    | Trmt6         | tRNA methyltransferase 6 homolog (S. cerevisiae)                        | 2  | BG079674  |
| 132 | 1453684_s_at | -1.09753 | 9.95E-07    | 0.000189984 | Zc3h15        | zinc finger CCCH-type containing 15                                     | 2  | AK005661  |
| 133 | 1423571_at   | -1.10491 | 2.78E-06    | 0.000353669 | S1pr1         | sphingosine-1-phosphate receptor 1                                      | 3  | BB133079  |
| 134 | 1442939_at   | -1.11173 | 4.05E-06    | 0.000447528 | Rif1          | Rap1 interacting factor 1 homolog (yeast)                               | 2  | BG065807  |
| 135 | 1448183_a_at | -1.11236 | 1.73E-06    | 0.000265269 | Hif1a         | hypoxia inducible factor 1, alpha subunit                               | 12 | BB269715  |
| 136 | 1424768_at   | -1.11544 | 1.19E-07    | 6.57E-05    | Cald1         | caldesmon 1                                                             | 6  | BI248947  |
| 137 | 1426636_a_at | -1.11717 | 3.17E-06    | 0.000379801 | Xiap          | X-linked inhibitor of apoptosis                                         | X  | BB783769  |
| 138 | 1420941_at   | -1.11884 | 4.65E-05    | 0.0022263   | Rgs5          | regulator of G-protein signaling 5                                      | 1  | BF585144  |
| 139 | 1438804_at   | -1.12113 | 3.70E-05    | 0.00195938  | 9-Sep         | septin 10                                                               | 10 | AV254985  |
| 140 | 1416732_at   | -1.12259 | 1.16E-07    | 6.52E-05    | Top2b         | topoisomerase (DNA) II beta                                             | 14 | BB166592  |
| 141 | 1423184_at   | -1.12491 | 1.13E-07    | 6.51E-05    | Itsn2         | intersectin 2                                                           | 12 | AI326108  |
| 142 | 1450051_at   | -1.12984 | 1.47E-06    | 0.000236443 | Atrx          | alpha thalassemia/mental retardation syndrome X-linked homolog (human)  | X  | BB825830  |
| 143 | 1428547_at   | -1.13029 | 2.81E-06    | 0.000356514 | Nt5e          | 5' nucleotidase, ecto                                                   | 9  | AV273591  |
| 144 | 1443889_at   | -1.13196 | 0.00252784  | 0.0305699   | 9030619P08Rik | RIKEN cDNA 9030619P08 gene                                              | 15 | AI789751  |
| 145 | 1418659_at   | -1.13267 | 5.62E-06    | 0.000558514 | Clock         | circadian locomoter output cycles kaput                                 | 5  | BB203106  |
| 146 | 1456767_at   | -1.13909 | 9.75E-05    | 0.00358805  | Lrfn3         | leucine rich repeat and fibronectin type III domain containing 3        | 7  | AV062156  |
| 147 | 1449931_at   | -1.14329 | 8.71E-06    | 0.000753023 | Cpeb4         | cytoplasmic polyadenylation element binding protein 4                   | 11 | NM_026252 |
| 148 | 1418188_a_at | -1.15527 | 0.00245426  | 0.030027    |               |                                                                         |    | AF146523  |
| 149 | 1429772_at   | -1.16055 | 9.07E-08    | 5.70E-05    | Plxna2        | plexin A2                                                               | 1  | BB085537  |
| 150 | 1425742_a_at | -1.16247 | 0.000779771 | 0.0140955   | Tsc22d1       | TSC22 domain family, member 1                                           | 14 | AF201285  |
| 151 | 1416421_a_at | -1.16429 | 6.67E-08    | 5.70E-05    | Ssb           | Sjogren syndrome antigen B                                              | 2  | BG796845  |
| 152 | 1460729_at   | -1.16434 | 2.39E-06    | 0.000325508 | Rock1         | Rho-associated coiled-coil containing protein kinase 1                  | 18 | BI662863  |
| 153 | 1420479_a_at | -1.16858 | 8.14E-07    | 0.000177992 | Nap111        | nucleosome assembly protein 1-like 1                                    | 10 | BG064031  |
| 154 | 1458539_at   | -1.18178 | 2.85E-07    | 9.93E-05    | R3hdm1        | R3H domain 1 (binds single-stranded nucleic acids)                      | 1  | BB462088  |

|     |              |          |             |             |               |                                                                         |    |           |
|-----|--------------|----------|-------------|-------------|---------------|-------------------------------------------------------------------------|----|-----------|
| 155 | 1427037_at   | -1.18376 | 1.09E-05    | 0.000877944 | Eif4g1        | eukaryotic translation initiation factor 4, gamma 1                     | 16 | BF227830  |
| 156 | 1421885_at   | -1.18541 | 4.90E-10    | 1.28E-05    | Sos1          | son of sevenless homolog 1 (Drosophila)                                 | 17 | BB471450  |
| 157 | 1436181_at   | -1.18647 | 7.17E-06    | 0.000652303 | Asap2         | ArfGAP with SH3 domain, ankyrin repeat and PH domain 2                  | 12 | AV077160  |
| 158 | 1452661_at   | -1.18719 | 0.036628    | 0.17322     | Tfrc          | transferrin receptor                                                    | 16 | AK011596  |
| 159 | 1456827_at   | -1.18755 | 7.73E-06    | 0.000690167 |               |                                                                         |    | BB131790  |
| 160 | 1438264_a_at | -1.18756 | 9.62E-07    | 0.000189984 | Tpp2          | tripeptidyl peptidase II                                                | 1  | AW536258  |
| 161 | 1437073_x_at | -1.19284 | 0.00228917  | 0.0285402   |               |                                                                         |    | BB115446  |
| 162 | 1433453_a_at | -1.19616 | 0.000686104 | 0.0129454   | Abtb2         | ankyrin repeat and BTB (POZ) domain containing 2                        | 2  | BB621938  |
| 163 | 1438713_at   | -1.1977  | 4.28E-07    | 0.00011939  | Rassf8        | Ras association (RalGDS/AF-6) domain family (N-terminal) member 8       | 6  | BB391868  |
| 164 | 1450010_at   | -1.19803 | 1.95E-08    | 3.18E-05    | Hsd17b12      | hydroxysteroid (17-beta) dehydrogenase 12                               | 2  | AK012103  |
| 165 | 1444512_at   | -1.20004 | 0.000132298 | 0.00430734  | Arhgap29      | Rho GTPase activating protein 29                                        | 3  | AI643890  |
| 166 | 1419497_at   | -1.2051  | 1.61E-06    | 0.000254163 | Cdkn1b        | cyclin-dependent kinase inhibitor 1B                                    | 6  | NM_009875 |
| 167 | 1459860_x_at | -1.20642 | 2.31E-08    | 3.56E-05    | Trim2         | tripartite motif-containing 2                                           | 3  | BB466780  |
| 168 | 1452378_at   | -1.21461 | 0.00210728  | 0.0269513   | Malat1        | metastasis associated lung adenocarcinoma transcript 1 (non-coding RNA) | 19 | AW012617  |
| 169 | 1448551_a_at | -1.22642 | 5.01E-07    | 0.000129948 | Trim2         | tripartite motif-containing 2                                           | 3  | BB283676  |
| 170 | 1424318_at   | -1.22749 | 0.000272504 | 0.00693737  | 1110067D22Rik | RIKEN cDNA 1110067D22 gene                                              | 11 | BC019131  |
| 171 | 1449514_at   | -1.2283  | 8.21E-08    | 5.70E-05    | Grk5          | G protein-coupled receptor kinase 5                                     | 19 | BC019379  |
| 172 | 1428372_at   | -1.22891 | 1.50E-06    | 0.000239345 | St5           | suppression of tumorigenicity 5                                         | 7  | AK008100  |
| 173 | 1439158_at   | -1.23171 | 1.48E-06    | 0.000237306 | Tlk1          | tousled-like kinase 1                                                   | 2  | BB749708  |
| 174 | 1427408_a_at | -1.23521 | 1.94E-05    | 0.00131035  | Thrap3        | thyroid hormone receptor associated protein 3                           | 4  | BC012655  |
| 175 | 1437609_at   | -1.2415  | 9.08E-06    | 0.000775618 | Ube2u         | ubiquitin-conjugating enzyme E2U (putative)                             | 4  | AV278535  |
| 176 | 1417496_at   | -1.24337 | 2.33E-07    | 8.93E-05    | Cp            | ceruloplasmin                                                           | 3  | BB332449  |
| 177 | 1429533_at   | -1.25295 | 1.02E-06    | 0.000189984 | Immt          | inner membrane protein, mitochondrial                                   | 6  | BB222675  |
| 178 | 1457554_at   | -1.25642 | 3.37E-05    | 0.00185211  | Apob          | apolipoprotein B                                                        | 12 | BM251092  |
| 179 | 1424029_at   | -1.26856 | 0.000459005 | 0.0098461   | Tspyl4        | TSPY-like 4                                                             | 10 | BC017540  |
| 180 | 1424486_a_at | -1.27129 | 2.88E-07    | 9.93E-05    | Txnrd1        | thioredoxin reductase 1                                                 | 10 | BB284199  |
| 181 | 1442367_at   | -1.28575 | 4.25E-06    | 0.000462908 | Atp11c        | ATPase, class VI, type 11C                                              | X  | BB184010  |
| 182 | 1450090_at   | -1.28734 | 9.53E-07    | 0.000189962 | Zfp101        | zinc finger protein 101                                                 | 17 | NM_009542 |
| 183 | 1450018_s_at | -1.29313 | 0.0031492   | 0.0358639   | Slc25a30      | solute carrier family 25, member 30                                     | 14 | BB032012  |
| 184 | 1438269_at   | -1.295   | 4.39E-07    | 0.00012023  | Zbtb38        | zinc finger and BTB domain containing 38                                | 9  | BB278987  |
| 185 | 1451313_a_at | -1.29648 | 0.00108866  | 0.0175371   | 1110067D22Rik | RIKEN cDNA 1110067D22 gene                                              | 11 | BC019131  |
| 186 | 1433446_at   | -1.29922 | 3.80E-05    | 0.00198593  | Hmgcs1        | 3-hydroxy-3-methylglutaryl-Coenzyme A synthase 1                        | 13 | BB705380  |
| 187 | 1450846_at   | -1.3017  | 7.24E-06    | 0.000656946 | Bzw1          | basic leucine zipper and W2 domains 1                                   | 1  | AV144956  |
| 188 | 1423397_at   | -1.30314 | 0.00159809  | 0.0223839   |               |                                                                         |    | AI118428  |
| 189 | 1443901_at   | -1.30719 | 1.50E-07    | 7.31E-05    | C2cd2         | C2 calcium-dependent domain containing 2                                | 16 | BB481579  |
| 190 | 1452030_a_at | -1.30993 | 8.26E-08    | 5.70E-05    | Hnrnpr        | heterogeneous nuclear ribonucleoprotein R                               | 4  | BB822465  |
| 191 | 1433515_s_at | -1.31147 | 1.44E-08    | 3.01E-05    | Etnk1         | ethanolamine kinase 1                                                   | 6  | BG066916  |
| 192 | 1420917_at   | -1.31895 | 8.41E-07    | 0.000179812 | Prpf40a       | PRP40 pre-mRNA processing factor 40 homolog A (yeast)                   | 2  | BG064340  |



|     |              |          |             |             |          |                                                                                |    |           |
|-----|--------------|----------|-------------|-------------|----------|--------------------------------------------------------------------------------|----|-----------|
| 193 | 1435775_at   | -1.31952 | 8.62E-08    | 5.70E-05    | Clock    | circadian locomoter output cycles kaput                                        | 5  | BQ173970  |
| 194 | 1427574_s_at | -1.32668 | 1.71E-06    | 0.000264709 | Sh3d19   | SH3 domain protein D19                                                         | 3  | BF232848  |
| 195 | 1417832_at   | -1.3413  | 3.13E-09    | 1.84E-05    | Smc1a    | structural maintenance of chromosomes 1A                                       | X  | BB156359  |
| 196 | 1450035_a_at | -1.35058 | 3.02E-07    | 0.00010223  | Prpf40a  | PRP40 pre-mRNA processing factor 40 homolog A (yeast)                          | 2  | BG064340  |
| 197 | 1437932_a_at | -1.35605 | 6.57E-05    | 0.00279332  | Cldn1    | claudin 1                                                                      | 16 | AV227581  |
| 198 | 1433898_at   | -1.36753 | 0.00283465  | 0.0332979   |          |                                                                                |    | AV000840  |
| 199 | 1457758_at   | -1.3842  | 2.87E-09    | 1.84E-05    | Eny2     | enhancer of yellow 2 homolog (Drosophila)                                      | 15 | BB055459  |
| 200 | 1423447_at   | -1.40514 | 8.33E-06    | 0.000733154 | Clpx     | caseinolytic peptidase X (E.coli)                                              | 9  | BF020441  |
| 201 | 1450743_s_at | -1.4165  | 3.35E-07    | 0.00010772  | Syncrip  | synaptotagmin binding, cytoplasmic RNA interacting protein                     | 9  | BG920261  |
| 202 | 1431024_a_at | -1.41823 | 2.81E-05    | 0.00165918  | Arid4b   | AT rich interactive domain 4B (RBP1-like)                                      | 13 | AK020165  |
| 203 | 1440522_at   | -1.42675 | 9.15E-08    | 5.70E-05    | Gm10454  | predicted gene 10454                                                           | X  | BB349472  |
| 204 | 1438751_at   | -1.45438 | 4.47E-05    | 0.00218559  | Slc30a10 | solute carrier family 30, member 10                                            | 1  | BB736474  |
| 205 | 1452445_at   | -1.45681 | 0.000155482 | 0.00475889  | Slc41a2  | solute carrier family 41, member 2                                             | 10 | BC026874  |
| 206 | 1425099_a_at | -1.47001 | 0.000413267 | 0.00916261  | Arntl    | aryl hydrocarbon receptor nuclear translocator-like                            | 7  | BC011080  |
| 207 | 1433944_at   | -1.4783  | 9.70E-07    | 0.000189984 | Hectd2   | HECT domain containing 2                                                       | 19 | AV256030  |
| 208 | 1450264_a_at | -1.48087 | 3.01E-05    | 0.0017271   | Chka     | choline kinase alpha                                                           | 19 | NM_013490 |
| 209 | 1423325_at   | -1.49602 | 5.89E-06    | 0.000573529 | Pnn      | pinin                                                                          | 12 | AV135835  |
| 210 | 1426458_at   | -1.52054 | 2.31E-07    | 8.93E-05    | Slmap    | sarcolemma associated protein                                                  | 14 | BB473571  |
| 211 | 1437581_at   | -1.53472 | 3.91E-06    | 0.00043727  | Zfp800   | zinc finger protein 800                                                        | 6  | AW824355  |
| 212 | 1426645_at   | -1.54547 | 8.41E-05    | 0.00325938  | Hsp90aa1 | heat shock protein 90, alpha (cytosolic), class A member 1                     | 12 | AU079047  |
| 213 | 1417980_a_at | -1.55575 | 2.41E-06    | 0.000327028 | Insig2   | insulin induced gene 2                                                         | 1  | AV257512  |
| 214 | 1422769_at   | -1.57914 | 1.40E-06    | 0.000232284 | Syncrip  | synaptotagmin binding, cytoplasmic RNA interacting protein                     | 9  | BG920261  |
| 215 | 1417981_at   | -1.58882 | 6.70E-07    | 0.00016089  | Insig2   | insulin induced gene 2                                                         | 1  | AV257512  |
| 216 | 1417982_at   | -1.81288 | 4.47E-08    | 5.04E-05    | Insig2   | insulin induced gene 2                                                         | 1  | AV257512  |
| 217 | 1421447_at   | -1.83832 | 0.0236092   | 0.131838    |          |                                                                                |    | NM_008262 |
| 218 | 1427838_at   | -1.84653 | 2.44E-05    | 0.00153458  | Tubb2a   | tubulin, beta 2A                                                               | 13 | M28739    |
| 219 | 1420722_at   | -1.97947 | 2.22E-06    | 0.000312665 | Elovl3   | elongation of very long chain fatty acids (FEN1/Elo2, SUR4/Elo3, yeast)-like 3 | 19 | BC016468  |
| 220 | 1427347_s_at | -2.06277 | 7.86E-05    | 0.003118    | Tubb2a   | tubulin, beta 2A                                                               | 13 | BC003475  |
| 221 | 1426215_at   | -2.10055 | 1.08E-08    | 3.01E-05    | Ddc      | dopa decarboxylase                                                             | 11 | AF071068  |
| 222 | 1439300_at   | -2.19417 | 3.08E-08    | 4.10E-05    | Chic1    | cysteine-rich hydrophobic domain 1                                             | X  | BG065782  |

#### SHS<sup>4</sup> & SHS<sup>4HR</sup> vs C

|   | Probeset_id  | Log2Ratio.1 | P.Value    | Adj.P.Value | Symbol | Description                         | Chromosome | GenBank   |
|---|--------------|-------------|------------|-------------|--------|-------------------------------------|------------|-----------|
| 1 | 1426037_a_at | 3.54318     | 2.81E-06   | 0.000527558 | Rgs16  | regulator of G-protein signaling 16 | 1          | U94828    |
| 2 | 1422557_s_at | 3.46629     | 0.00403622 | 0.0410515   | Mt1    | metallothionein 1                   | 8          | NM_013602 |
| 3 | 1428942_at   | 3.26031     | 0.0206807  | 0.115053    | Mt2    | metallothionein 2                   | 8          | AA796766  |
| 4 | 1417168_a_at | 3.24514     | 1.70E-09   | 1.30E-05    | Usp2   | ubiquitin specific peptidase 2      | 9          | AI553394  |

|    |              |         |             |             |         |                                                                       |    |           |
|----|--------------|---------|-------------|-------------|---------|-----------------------------------------------------------------------|----|-----------|
| 5  | 1422257_s_at | 2.94269 | 0.00184722  | 0.0246219   | Cyp2b10 | cytochrome P450, family 2, subfamily b, polypeptide 10                | 7  | NM_009998 |
| 6  | 1425645_s_at | 2.88808 | 0.00196963  | 0.0257079   | Cyp2b10 | cytochrome P450, family 2, subfamily b, polypeptide 10                | 7  | AF128849  |
| 7  | 1417169_at   | 2.86908 | 2.58E-10    | 7.57E-06    | Usp2    | ubiquitin specific peptidase 2                                        | 9  | A1553394  |
| 8  | 1455265_a_at | 2.86352 | 1.14E-06    | 0.00031903  | Rgs16   | regulator of G-protein signaling 16                                   | 1  | BB100249  |
| 9  | 1451787_at   | 2.61325 | 0.00214069  | 0.0272347   | Cyp2b10 | cytochrome P450, family 2, subfamily b, polypeptide 10                | 7  | AF128849  |
| 10 | 1442025_a_at | 2.38743 | 0.0014187   | 0.0205469   |         |                                                                       |    | AI467657  |
| 11 | 1419874_x_at | 2.28091 | 0.000836699 | 0.0145848   | Zbtb16  | zinc finger and BTB domain containing 16                              | 9  | AA419994  |
| 12 | 1418288_at   | 2.26513 | 1.04E-05    | 0.00103098  | Lpin1   | lipin 1                                                               | 12 | NM_015763 |
| 13 | 1427747_a_at | 2.22071 | 0.0325637   | 0.152134    | Lcn2    | lipocalin 2                                                           | 2  | X14607    |
| 14 | 1428223_at   | 2.17402 | 1.37E-05    | 0.00120468  | Mfsd2a  | major facilitator superfamily domain containing 2A                    | 4  | AK006096  |
| 15 | 1443147_at   | 2.16824 | 0.0215029   | 0.118058    |         |                                                                       |    | BB505010  |
| 16 | 1426516_a_at | 2.15556 | 1.58E-05    | 0.00128344  | Lpin1   | lipin 1                                                               | 12 | AK014526  |
| 17 | 1416125_at   | 2.09521 | 1.15E-05    | 0.00108669  | Fkbp5   | FK506 binding protein 5                                               | 17 | U16959    |
| 18 | 1435188_at   | 1.95613 | 9.20E-08    | 8.43E-05    | Gm129   | predicted gene 129                                                    | 3  | BB407125  |
| 19 | 1425837_a_at | 1.93271 | 0.000598088 | 0.0118333   |         |                                                                       |    | AF199491  |
| 20 | 1451190_a_at | 1.92231 | 7.43E-08    | 7.26E-05    | Sbk1    | SH3-binding kinase 1                                                  | 7  | BC025837  |
| 21 | 1428923_at   | 1.87038 | 0.000149146 | 0.00492702  | Ppp1r3g | protein phosphatase 1, regulatory (inhibitor) subunit 3G              | 13 | AK005570  |
| 22 | 1451548_at   | 1.86397 | 6.81E-06    | 0.000826531 | Upp2    | uridine phosphorylase 2                                               | 2  | BC027189  |
| 23 | 1422925_s_at | 1.84538 | 0.00629946  | 0.0545645   | Acot3   | acyl-CoA thioesterase 3                                               | 12 | NM_134246 |
| 24 | 1424969_s_at | 1.80657 | 2.79E-06    | 0.000527558 | Upp2    | uridine phosphorylase 2                                               | 2  | BC027189  |
| 25 | 1460241_a_at | 1.77415 | 0.00023503  | 0.0066156   | St3gal5 | ST3 beta-galactoside alpha-2,3-sialyltransferase 5                    | 6  | BB829192  |
| 26 | 1419590_at   | 1.75875 | 0.00847351  | 0.0656702   |         |                                                                       |    | NM_010000 |
| 27 | 1416432_at   | 1.70676 | 0.000179236 | 0.00556353  | Pfkfb3  | 6-phosphofructo-2-kinase/fructose-2,6-biphosphatase 3                 | 2  | NM_133232 |
| 28 | 1423978_at   | 1.70474 | 4.55E-08    | 6.08E-05    | Sbk1    | SH3-binding kinase 1                                                  | 7  | BC025837  |
| 29 | 1442026_at   | 1.6864  | 0.00176898  | 0.0239321   |         |                                                                       |    | AI467657  |
| 30 | 1429144_at   | 1.60963 | 0.000283128 | 0.00749433  | Gpcpd1  | glycerophosphocholine phosphodiesterase GDE1 homolog (S. cerevisiae)  | 2  | AV291259  |
| 31 | 1434437_x_at | 1.59806 | 9.73E-05    | 0.00381855  | Rrm2    | ribonucleotide reductase M2                                           | 12 | AV301324  |
| 32 | 1416933_at   | 1.59443 | 1.60E-07    | 0.000118507 | Por     | P450 (cytochrome) oxidoreductase                                      | 5  | NM_008898 |
| 33 | 1449198_a_at | 1.57747 | 3.08E-05    | 0.00190673  | St3gal5 | ST3 beta-galactoside alpha-2,3-sialyltransferase 5                    | 6  | BB829192  |
| 34 | 1439489_at   | 1.54199 | 0.0150026   | 0.094154    | Gpr120  | G protein-coupled receptor 120                                        | 19 | AV025152  |
| 35 | 1448162_at   | 1.54189 | 2.88E-06    | 0.000534906 | Vcam1   | vascular cell adhesion molecule 1                                     | 3  | BB250384  |
| 36 | 1451452_a_at | 1.53792 | 1.05E-06    | 0.000314071 | Rgs16   | regulator of G-protein signaling 16                                   | 1  | U72881    |
| 37 | 1429206_at   | 1.52315 | 2.01E-07    | 0.000123167 | Rhobtb1 | Rho-related BTB domain containing 1                                   | 10 | AK014194  |
| 38 | 1443137_at   | 1.52178 | 0.0159406   | 0.0978818   |         |                                                                       |    | BB534298  |
| 39 | 1453023_at   | 1.51806 | 0.000190435 | 0.00580111  |         |                                                                       |    | AK003441  |
| 40 | 1434473_at   | 1.49278 | 0.00189028  | 0.0250191   | Slc16a5 | solute carrier family 16 (monocarboxylic acid transporters), member 5 | 11 | AI647939  |
| 41 | 1417761_at   | 1.49219 | 0.00402874  | 0.0410426   | Apoa4   | apolipoprotein A-IV                                                   | 9  | BC010769  |

|    |              |         |             |             |               |                                                                      |    |           |
|----|--------------|---------|-------------|-------------|---------------|----------------------------------------------------------------------|----|-----------|
| 42 | 1439163_at   | 1.48265 | 0.00682332  | 0.0573542   | Zbtb16        | zinc finger and BTB domain containing 16                             | 9  | BQ174973  |
| 43 | 1417602_at   | 1.46931 | 4.50E-07    | 0.000188234 | Per2          | period homolog 2 (Drosophila)                                        | 1  | AF035830  |
| 44 | 1425824_a_at | 1.44956 | 1.63E-05    | 0.00130796  | Pcsk4         | proprotein convertase subtilisin/kexin type 4                        | 10 | D01093    |
| 45 | 1448239_at   | 1.43744 | 0.00090093  | 0.015285    | Hmox1         | heme oxygenase (decycling) 1                                         | 8  | NM_010442 |
| 46 | 1452416_at   | 1.43303 | 1.14E-06    | 0.00031903  | Il6ra         | interleukin 6 receptor, alpha                                        | 3  | X53802    |
| 47 | 1427473_at   | 1.41786 | 0.0335956   | 0.155242    | Gstm3         | glutathione S-transferase, mu 3                                      | 3  | J03953    |
| 48 | 1460059_at   | 1.41553 | 4.05E-05    | 0.0022902   | Upp2          | uridine phosphorylase 2                                              | 2  | BB272732  |
| 49 | 1449851_at   | 1.40328 | 1.38E-06    | 0.000344837 | Per1          | period homolog 1 (Drosophila)                                        | 11 | AF022992  |
| 50 | 1452426_x_at | 1.38167 | 0.00134302  | 0.0198246   |               |                                                                      |    | BC004065  |
| 51 | 1417904_at   | 1.38009 | 0.000459866 | 0.0100983   | Dclre1a       | DNA cross-link repair 1A, PSO2 homolog (S. cerevisiae)               | 19 | AF241240  |
| 52 | 1456960_at   | 1.34477 | 0.0222761   | 0.120742    |               |                                                                      |    | BB555069  |
| 53 | 1448226_at   | 1.33683 | 0.00117333  | 0.0181621   | Rrm2          | ribonucleotide reductase M2                                          | 12 | NM_009104 |
| 54 | 1436504_x_at | 1.33662 | 0.00545864  | 0.0497344   | Apoa4         | apolipoprotein A-IV                                                  | 9  | AV027367  |
| 55 | 1450505_a_at | 1.33564 | 0.00100863  | 0.0164284   | Fam134b       | family with sequence similarity 134, member B                        | 15 | NM_025459 |
| 56 | 1440840_at   | 1.33428 | 7.62E-09    | 2.22E-05    | D630004K10Rik | RIKEN cDNA D630004K10 gene                                           | 10 | BB335455  |
| 57 | 1423233_at   | 1.3023  | 0.000901649 | 0.015285    | Cebpδ         | CCAAT/enhancer binding protein (C/EBP), delta                        | 16 | BB831146  |
| 58 | 1416773_at   | 1.29636 | 3.82E-06    | 0.000625046 | Wee1          | WEE 1 homolog 1 (S. pombe)                                           | 7  | NM_009516 |
| 59 | 1460510_a_at | 1.28756 | 2.23E-06    | 0.000448303 | Coq10b        | coenzyme Q10 homolog B (S. cerevisiae)                               | 1  | AK006551  |
| 60 | 1435459_at   | 1.27914 | 0.000295712 | 0.00770217  | Fmo2          | flavin containing monooxygenase 2                                    | 1  | BM936480  |
| 61 | 1426452_a_at | 1.2788  | 0.0281134   | 0.139011    | Rab30         | RAB30, member RAS oncogene family                                    | 7  | BG070713  |
| 62 | 1458040_at   | 1.272   | 0.000523413 | 0.0108197   |               |                                                                      |    | BM213832  |
| 63 | 1421681_at   | 1.2682  | 8.48E-05    | 0.00350633  | Nrg4          | neuregulin 4                                                         | 9  | NM_032002 |
| 64 | 1437953_at   | 1.26172 | 0.000148845 | 0.00492262  | Gpcpd1        | glycerophosphocholine phosphodiesterase GDE1 homolog (S. cerevisiae) | 2  | BM246706  |
| 65 | 1435495_at   | 1.25937 | 0.00156021  | 0.0219373   | Adora1        | adenosine A1 receptor                                                | 1  | BE630294  |
| 66 | 1426850_a_at | 1.25071 | 7.94E-05    | 0.00333718  | Map2k6        | mitogen-activated protein kinase kinase 6                            | 11 | BB261602  |
| 67 | 1421852_at   | 1.24705 | 0.00102077  | 0.0165802   | Kenk5         | potassium channel, subfamily K, member 5                             | 14 | AF319542  |
| 68 | 1443870_at   | 1.24644 | 0.000129742 | 0.00456691  | Abcc4         | ATP-binding cassette, sub-family C (CFTR/MRP), member 4              | 14 | BB291885  |
| 69 | 1441971_at   | 1.24317 | 0.000586489 | 0.0116802   |               |                                                                      |    | AW543723  |
| 70 | 1422230_s_at | 1.24154 | 2.41E-08    | 4.70E-05    |               |                                                                      |    | NM_007812 |
| 71 | 1458442_at   | 1.23946 | 0.00785727  | 0.0625635   | AI132709      | expressed sequence AI132709                                          | 7  | AI266897  |
| 72 | 1440084_at   | 1.23942 | 0.00144152  | 0.0208178   |               |                                                                      |    | AV380966  |
| 73 | 1424175_at   | 1.23833 | 5.62E-08    | 6.58E-05    | Tef           | thyrotroph embryonic factor                                          | 15 | BC017689  |
| 74 | 1424744_at   | 1.2307  | 0.00292498  | 0.0336637   | Sds           | serine dehydratase                                                   | 5  | BC021950  |
| 75 | 1434292_at   | 1.21291 | 0.000850327 | 0.0147608   | Snhg11        | small nucleolar RNA host gene 11 (non-protein coding)                | 2  | BI731047  |
| 76 | 1418780_at   | 1.21152 | 0.0031624   | 0.0353412   | Cyp39a1       | cytochrome P450, family 39, subfamily a, polypeptide 1               | 17 | NM_018887 |
| 77 | 1453410_at   | 1.20724 | 0.0112369   | 0.0785831   | Angptl4       | angiopoietin-like 4                                                  | 17 | AK014564  |
| 78 | 1456156_at   | 1.19909 | 6.39E-05    | 0.00295409  | Lepr          | leptin receptor                                                      | 4  | BM124366  |
| 79 | 1449498_at   | 1.19846 | 0.000447822 | 0.00994096  | Marco         | macrophage receptor with collagenous structure                       | 1  | NM_010766 |
| 80 | 1449565_at   | 1.19834 | 6.89E-06    | 0.000826531 | Cyp2g1        | cytochrome P450, family 2, subfamily g, polypeptide 1                | 7  | NM_013809 |

|     |              |         |             |             |               |                                                                          |    |           |
|-----|--------------|---------|-------------|-------------|---------------|--------------------------------------------------------------------------|----|-----------|
| 81  | 1428352_at   | 1.19705 | 0.00305943  | 0.0346129   | Arrdc2        | arrestin domain containing 2                                             | 8  | AW542672  |
| 82  | 1418595_at   | 1.18548 | 0.000919408 | 0.0154742   | Plin4         | perilipin 4                                                              | 17 | NM_020568 |
| 83  | 1417042_at   | 1.17816 | 4.03E-07    | 0.000176051 | Slc37a4       | solute carrier family 37 (glucose-6-phosphate transporter), member 4     | 9  | NM_008063 |
| 84  | 1451612_at   | 1.17116 | 0.0136109   | 0.0885955   | Mt1           | metallothionein 1                                                        | 8  | BC027262  |
| 85  | 1426980_s_at | 1.16895 | 0.000329457 | 0.00825757  | E130012A19Rik | RIKEN cDNA E130012A19 gene                                               | 11 | BC006054  |
| 86  | 1445574_at   | 1.16415 | 0.000130946 | 0.00457327  |               |                                                                          |    | BG067678  |
| 87  | 1429809_at   | 1.16207 | 2.22E-09    | 1.30E-05    | Tmtc2         | transmembrane and tetratricopeptide repeat containing 2                  | 10 | AK018506  |
| 88  | 1455958_s_at | 1.15244 | 0.00183218  | 0.0244781   | Pptc7         | PTC7 protein phosphatase homolog (S. cerevisiae)                         | 5  | AI881989  |
| 89  | 1431339_a_at | 1.15051 | 4.15E-05    | 0.00231736  | Efhd2         | EF hand domain containing 2                                              | 4  | AK007560  |
| 90  | 1428512_at   | 1.14241 | 0.00647051  | 0.0555029   | Bhlhb9        | basic helix-loop-helix domain containing, class B9                       | X  | AK012577  |
| 91  | 1455002_at   | 1.14129 | 3.19E-06    | 0.000566639 | Ptp4a1        | protein tyrosine phosphatase 4a1                                         | 1  | AV331223  |
| 92  | 1428926_at   | 1.13272 | 2.62E-05    | 0.00170473  | 1110003O08Rik | RIKEN cDNA 1110003O08 gene                                               | 8  | AK003388  |
| 93  | 1457123_at   | 1.1248  | 0.00112945  | 0.0177168   | Nrg4          | neuregulin 4                                                             | 9  | BB219343  |
| 94  | 1416286_at   | 1.12282 | 0.00789314  | 0.0627638   | Rgs4          | regulator of G-protein signaling 4                                       | 1  | NM_009062 |
| 95  | 1432543_a_at | 1.1154  | 1.98E-06    | 0.000420999 | Klf13         | Kruppel-like factor 13                                                   | 7  | AK002926  |
| 96  | 1434456_at   | 1.11091 | 1.00E-05    | 0.00101727  | Rundc3b       | RUN domain containing 3B                                                 | 5  | BG075955  |
| 97  | 1435860_at   | 1.1079  | 6.79E-08    | 7.18E-05    | Slc5a6        | solute carrier family 5 (sodium-dependent vitamin transporter), member 6 | 5  | BF450030  |
| 98  | 1427912_at   | 1.10241 | 0.0152692   | 0.0949707   | Cbr3          | carbonyl reductase 3                                                     | 16 | AK003232  |
| 99  | 1456395_at   | 1.09807 | 0.0034357   | 0.0371761   | Ppargc1a      | peroxisome proliferative activated receptor, gamma, coactivator 1 alpha  | 5  | BM120569  |
| 100 | 1419857_at   | 1.09565 | 0.0316911   | 0.149247    |               |                                                                          |    | AA254866  |
| 101 | 1454799_at   | 1.09081 | 0.00389501  | 0.0402581   | Agpat9        | 1-acylglycerol-3-phosphate O-acyltransferase 9                           | 5  | AV300264  |
| 102 | 1449945_at   | 1.06025 | 3.10E-05    | 0.00191379  | Ppargc1b      | peroxisome proliferative activated receptor, gamma, coactivator 1 beta   | 18 | NM_133249 |
| 103 | 1434099_at   | 1.04721 | 0.00151229  | 0.0215426   | Ppargc1a      | peroxisome proliferative activated receptor, gamma, coactivator 1 alpha  | 5  | BB752393  |
| 104 | 1419758_at   | 1.04695 | 0.000727962 | 0.0133735   | Abcb1a        | ATP-binding cassette, sub-family B (MDR/TAP), member 1A                  | 5  | M30697    |
| 105 | 1422905_s_at | 1.04498 | 0.000768908 | 0.0138309   | Fmo2          | flavin containing monooxygenase 2                                        | 1  | NM_018881 |
| 106 | 1437478_s_at | 1.04052 | 3.11E-06    | 0.000555278 | Efhd2         | EF hand domain containing 2                                              | 4  | AA409309  |
| 107 | 1423627_at   | 1.03984 | 0.00234188  | 0.0288322   | Nqo1          | NAD(P)H dehydrogenase, quinone 1                                         | 8  | AV158882  |
| 108 | 1438211_s_at | 1.0364  | 0.0498512   | 0.199174    | Dbp           | D site albumin promoter binding protein                                  | 7  | BB550183  |
| 109 | 1424815_at   | 1.03202 | 2.25E-05    | 0.00157535  | Gys2          | glycogen synthase 2                                                      | 6  | BC021322  |
| 110 | 1424683_at   | 1.0287  | 0.00296526  | 0.0339938   | Fam134b       | family with sequence similarity 134, member B                            | 15 | BC019494  |
| 111 | 1419024_at   | 1.02753 | 0.000709174 | 0.0131938   | Ptp4a1        | protein tyrosine phosphatase 4a1                                         | 1  | BC003761  |
| 112 | 1434100_x_at | 1.02553 | 0.00123889  | 0.0188093   | Ppargc1a      | peroxisome proliferative activated receptor, gamma, coactivator 1 alpha  | 5  | BB752393  |
| 113 | 1417969_at   | 1.02292 | 1.83E-05    | 0.00138468  | Fbxo31        | F-box protein 31                                                         | 8  | NM_133765 |
| 114 | 1448568_a_at | 1.02106 | 1.99E-05    | 0.00145969  | Slc20a1       | solute carrier family 20, member 1                                       | 2  | NM_015747 |
| 115 | 1420772_a_at | 1.00747 | 0.00907088  | 0.0684157   | Tsc22d3       | TSC22 domain family, member 3                                            | X  | NM_010286 |

|     |              |          |             |             |          |                                                                                  |    |           |
|-----|--------------|----------|-------------|-------------|----------|----------------------------------------------------------------------------------|----|-----------|
| 116 | 1428487_s_at | 1.00705  | 0.00109365  | 0.017388    | Coq10b   | coenzyme Q10 homolog B ( <i>S. cerevisiae</i> )                                  | 1  | AK002294  |
| 117 | 1433816_at   | 1.00556  | 0.000868251 | 0.0149832   | Mcart1   | mitochondrial carrier triple repeat 1                                            | 4  | BQ031264  |
| 118 | 1437751_at   | 1.00301  | 0.0151233   | 0.0946258   | Ppargc1a | peroxisome proliferative activated receptor, gamma, coactivator 1 alpha          | 5  | AV337619  |
| 119 | 1439377_x_at | -1.00348 | 0.00165719  | 0.0228728   | Cdc20    | cell division cycle 20 homolog ( <i>S. cerevisiae</i> )                          | 4  | BB041150  |
| 120 | 1455293_at   | -1.00569 | 7.16E-08    | 7.23E-05    | Leo1     | Leo1, Paf1/RNA polymerase II complex component, homolog ( <i>S. cerevisiae</i> ) | 9  | BG065311  |
| 121 | 1431056_a_at | -1.00785 | 1.27E-05    | 0.00116774  | Lpl      | lipoprotein lipase                                                               | 8  | AK017272  |
| 122 | 1450010_at   | -1.01328 | 2.10E-07    | 0.000123167 | Hsd17b12 | hydroxysteroid (17-beta) dehydrogenase 12                                        | 2  | AK012103  |
| 123 | 1433444_at   | -1.01491 | 0.000829522 | 0.0145245   | Hmgcs1   | 3-hydroxy-3-methylglutaryl-Coenzyme A synthase 1                                 | 13 | BB705380  |
| 124 | 1454633_at   | -1.01541 | 1.26E-07    | 0.000105868 | Etnk1    | ethanolamine kinase 1                                                            | 6  | BG066916  |
| 125 | 1417792_at   | -1.0218  | 3.92E-07    | 0.000174198 | Zfml     | zinc finger, matrin-like                                                         | 6  | BM238431  |
| 126 | 1417292_at   | -1.02183 | 6.83E-06    | 0.000826531 | Ifi47    | interferon gamma inducible protein 47                                            | 11 | NM_008330 |
| 127 | 1452445_at   | -1.0271  | 0.00345723  | 0.0373264   | Slc41a2  | solute carrier family 41, member 2                                               | 10 | BC026874  |
| 128 | 1433443_a_at | -1.0307  | 0.000751865 | 0.01365     | Hmgcs1   | 3-hydroxy-3-methylglutaryl-Coenzyme A synthase 1                                 | 13 | BB705380  |
| 129 | 1423804_a_at | -1.03079 | 0.0319405   | 0.149987    | Idi1     | isopentenyl-diphosphate delta isomerase                                          | 13 | BC004801  |
| 130 | 1420917_at   | -1.03456 | 6.36E-05    | 0.00295261  | Prpf40a  | PRP40 pre-mRNA processing factor 40 homolog A (yeast)                            | 2  | BG064340  |
| 131 | 1448986_x_at | -1.03579 | 0.036159    | 0.16297     | Dnase2a  | deoxyribonuclease II alpha                                                       | 8  | NM_010062 |
| 132 | 1436931_at   | -1.03674 | 0.00897558  | 0.0680219   | Rfx4     | regulatory factor X, 4 (influences HLA class II expression)                      | 10 | AV255458  |
| 133 | 1450035_a_at | -1.03912 | 4.73E-05    | 0.00251328  | Prpf40a  | PRP40 pre-mRNA processing factor 40 homolog A (yeast)                            | 2  | BG064340  |
| 134 | 1428022_at   | -1.04042 | 0.0311798   | 0.147932    | Lcn13    | lipocalin 13                                                                     | 2  | BC027556  |
| 135 | 1427356_at   | -1.0415  | 1.66E-05    | 0.00131889  | Fam89a   | family with sequence similarity 89, member A                                     | 8  | BC023460  |
| 136 | 1424033_at   | -1.0421  | 0.0046852   | 0.0451301   | Sfrs7    | splicing factor, arginine/serine-rich 7                                          | 17 | BC014857  |
| 137 | 1457758_at   | -1.04328 | 5.43E-06    | 0.000738943 | Eny2     | enhancer of yellow 2 homolog ( <i>Drosophila</i> )                               | 15 | BB055459  |
| 138 | 1416403_at   | -1.04537 | 2.70E-05    | 0.00173334  | Abcb10   | ATP-binding cassette, sub-family B (MDR/TAP), member 10                          | 8  | AV382118  |
| 139 | 1450846_at   | -1.04658 | 5.25E-05    | 0.00266137  | Bzw1     | basic leucine zipper and W2 domains 1                                            | 1  | AV144956  |
| 140 | 1435462_at   | -1.04721 | 0.00813653  | 0.0640045   | Plcx2    | phosphatidylinositol-specific phospholipase C, X domain containing 2             | 16 | BQ176176  |
| 141 | 1438713_at   | -1.04833 | 6.10E-07    | 0.000219561 | Rassf8   | Ras association (RalGDS/AF-6) domain family (N-terminal) member 8                | 6  | BB391868  |
| 142 | 1433515_s_at | -1.05135 | 1.31E-06    | 0.00033455  | Etnk1    | ethanolamine kinase 1                                                            | 6  | BG066916  |
| 143 | 1437864_at   | -1.05726 | 1.15E-06    | 0.00031903  | Adipor2  | adiponectin receptor 2                                                           | 6  | BE632137  |
| 144 | 1451122_at   | -1.05744 | 0.0309792   | 0.147596    | Idi1     | isopentenyl-diphosphate delta isomerase                                          | 13 | BC004801  |
| 145 | 1425206_a_at | -1.06114 | 4.34E-08    | 6.08E-05    | Ube3a    | ubiquitin protein ligase E3A                                                     | 7  | BB224620  |
| 146 | 1433445_x_at | -1.06127 | 0.000561088 | 0.0113386   | Hmgcs1   | 3-hydroxy-3-methylglutaryl-Coenzyme A synthase 1                                 | 13 | BB705380  |
| 147 | 1420379_at   | -1.07315 | 0.0123942   | 0.0837219   | Slco1a1  | solute carrier organic anion transporter family, member 1a1                      | 6  | AB031813  |
| 148 | 1448183_a_at | -1.07652 | 7.05E-07    | 0.000232199 | Hif1a    | hypoxia inducible factor 1, alpha subunit                                        | 12 | BB269715  |

|     |              |          |             |             |           |                                                                                                    |    |           |
|-----|--------------|----------|-------------|-------------|-----------|----------------------------------------------------------------------------------------------------|----|-----------|
| 149 | 1440522_at   | -1.07682 | 0.000107488 | 0.00405878  | Gm10454   | predicted gene 10454                                                                               | X  | BB349472  |
| 150 | 1428372_at   | -1.08492 | 1.79E-05    | 0.00135996  | St5       | suppression of tumorigenicity 5                                                                    | 7  | AK008100  |
| 151 | 1452030_a_at | -1.08521 | 3.50E-06    | 0.000599552 | Hnrnpr    | heterogeneous nuclear ribonucleoprotein R                                                          | 4  | BB822465  |
| 152 | 1450484_a_at | -1.08572 | 4.17E-06    | 0.000649219 | Cmpk2     | cytidine monophosphate (UMP-CMP) kinase 2, mitochondrial                                           | 12 | AK004595  |
| 153 | 1431024_a_at | -1.09081 | 0.000358396 | 0.00858686  | Arid4b    | AT rich interactive domain 4B (RBP1-like)                                                          | 13 | AK020165  |
| 154 | 1453286_at   | -1.10227 | 4.94E-07    | 0.000195799 | Plxna2    | plexin A2                                                                                          | 1  | BB085537  |
| 155 | 1417832_at   | -1.10807 | 1.96E-07    | 0.000123167 | Smc1a     | structural maintenance of chromosomes 1A                                                           | X  | BB156359  |
| 156 | 1424842_a_at | -1.10854 | 5.84E-06    | 0.000774214 | Arhgap24  | Rho GTPase activating protein 24                                                                   | 5  | BC025502  |
| 157 | 1455324_at   | -1.10967 | 0.00356044  | 0.0380438   | Plcx2     | phosphatidylinositol-specific phospholipase C, X domain containing 2                               | 16 | BQ176176  |
| 158 | 1426458_at   | -1.11961 | 0.000115048 | 0.0042245   | Simap     | sarcolemma associated protein                                                                      | 14 | BB473571  |
| 159 | 1438676_at   | -1.12775 | 0.0182889   | 0.106967    | Mpa21     | macrophage activation 2 like                                                                       | 5  | BM241485  |
| 160 | 1438269_at   | -1.12831 | 6.46E-07    | 0.000225493 | Zbtb38    | zinc finger and BTB domain containing 38                                                           | 9  | BB278987  |
| 161 | 1449931_at   | -1.1309  | 1.14E-06    | 0.00031903  | Cpeb4     | cytoplasmic polyadenylation element binding protein 4                                              | 11 | NM_026252 |
| 162 | 1442537_at   | -1.13626 | 0.00190417  | 0.0251093   |           |                                                                                                    |    | BB771206  |
| 163 | 1449854_at   | -1.1576  | 0.00602354  | 0.0531632   | Nr0b2     | nuclear receptor subfamily 0, group B, member 2                                                    | 4  | BC019540  |
| 164 | 1427574_s_at | -1.15973 | 9.38E-06    | 0.000984626 | Sh3d19    | SH3 domain protein D19                                                                             | 3  | BF232848  |
| 165 | 1435775_at   | -1.1648  | 5.13E-06    | 0.000718651 | Clock     | circadian locomotor output cycles kaput                                                            | 5  | BQ173970  |
| 166 | 1429772_at   | -1.16933 | 6.10E-08    | 6.87E-05    | Plxna2    | plexin A2                                                                                          | 1  | BB085537  |
| 167 | 1437932_a_at | -1.17127 | 0.000187866 | 0.0057522   | Cldn1     | claudin 1                                                                                          | 16 | AV227581  |
| 168 | 1423325_at   | -1.17186 | 0.000102936 | 0.00395224  | Pnn       | pinin                                                                                              | 12 | AV135835  |
| 169 | 1447927_at   | -1.1804  | 0.00921288  | 0.0691839   | Mpa21     | macrophage activation 2 like                                                                       | 5  | BG092512  |
| 170 | 1425099_a_at | -1.20471 | 0.00114204  | 0.0178815   | Arntl     | aryl hydrocarbon receptor nuclear translocator-like                                                | 7  | BC011080  |
| 171 | 1444512_at   | -1.20814 | 1.29E-05    | 0.00116875  | Arhgap29  | Rho GTPase activating protein 29                                                                   | 3  | AI643890  |
| 172 | 1420835_at   | -1.21438 | 0.000148556 | 0.00491863  | Slc25a30  | solute carrier family 25, member 30                                                                | 14 | BB032012  |
| 173 | 1442367_at   | -1.23752 | 3.35E-06    | 0.000585788 | Atp11c    | ATPase, class VI, type 11C                                                                         | X  | BB184010  |
| 174 | 1450743_s_at | -1.25166 | 1.04E-06    | 0.00031344  | Syncrip   | synaptotagmin binding, cytoplasmic RNA interacting protein                                         | 9  | BG920261  |
| 175 | 1417982_at   | -1.26983 | 0.00495309  | 0.0467726   | Insig2    | insulin induced gene 2                                                                             | 1  | AV257512  |
| 176 | 1427513_at   | -1.27542 | 0.00118846  | 0.0183169   | BC024137  | cDNA sequence BC024137                                                                             | 8  | BI144810  |
| 177 | 1430896_s_at | -1.27631 | 0.00193185  | 0.0253801   | Nudt7     | nudix (nucleoside diphosphate linked moiety X)-type motif 7                                        | 8  | AK008824  |
| 178 | 1450090_at   | -1.28931 | 8.71E-08    | 8.23E-05    | Zfp101    | zinc finger protein 101                                                                            | 17 | NM_009542 |
| 179 | 1449514_at   | -1.29532 | 9.08E-09    | 2.22E-05    | Grk5      | G protein-coupled receptor kinase 5                                                                | 19 | BC019379  |
| 180 | 1456074_at   | -1.31597 | 0.000345726 | 0.00846981  | Sdr9c7    | 4short chain dehydrogenase/reductase family 9C, member 7                                           | 10 | BB143568  |
| 181 | 1421092_at   | -1.32543 | 0.0147144   | 0.092943    | Serpina12 | serine (or cysteine) peptidase inhibitor, clade A (alpha-1 antiproteinase, antitrypsin), member 12 | 12 | AK014346  |
| 182 | 1423571_at   | -1.34272 | 7.65E-07    | 0.000243626 | S1pr1     | sphingosine-1-phosphate receptor 1                                                                 | 3  | BB133079  |
| 183 | 1420531_at   | -1.34599 | 0.0190975   | 0.109668    | Hsd3b5    | hydroxy-delta-5-steroid dehydrogenase, 3 beta-and steroid delta-isomerase 5                        | 3  | NM_008295 |

|     |              |          |             |             |              |                                                                                |    |           |
|-----|--------------|----------|-------------|-------------|--------------|--------------------------------------------------------------------------------|----|-----------|
| 184 | 1422769_at   | -1.35435 | 6.91E-06    | 0.000826531 | Syncrip      | synaptotagmin binding, cytoplasmic RNA interacting protein                     | 9  | BG920261  |
| 185 | 1437581_at   | -1.37879 | 1.81E-06    | 0.000405871 | Zfp800       | zinc finger protein 800                                                        | 6  | AW824355  |
| 186 | 1430785_at   | -1.39487 | 1.31E-05    | 0.00117124  | Sdr9c7       | 4short chain dehydrogenase/reductase family 9C, member 7                       | 10 | BB150587  |
| 187 | 1426215_at   | -1.40168 | 0.000522785 | 0.0108183   | Ddc          | dopa decarboxylase                                                             | 11 | AF071068  |
| 188 | 1426645_at   | -1.40547 | 7.22E-05    | 0.00318597  | Hsp90aa1     | heat shock protein 90, alpha (cytosolic), class A member 1                     | 12 | AU079047  |
| 189 | 1433446_at   | -1.43449 | 6.47E-06    | 0.000807214 | Hmgcs1       | 3-hydroxy-3-methylglutaryl-Coenzyme A synthase 1                               | 13 | BB705380  |
| 190 | 1420836_at   | -1.46472 | 0.000350378 | 0.00849491  | Slc25a30     | solute carrier family 25, member 30                                            | 14 | BB032012  |
| 191 | 1434520_at   | -1.46486 | 0.00219565  | 0.0276481   | Sc5d         | sterol-C5-desaturase (fungal ERG3, delta-5-desaturase) homolog (S. cerevisiae) | 9  | AU067703  |
| 192 | 1423397_at   | -1.47208 | 0.000188829 | 0.00577565  |              |                                                                                |    | AI118428  |
| 193 | 1444296_a_at | -1.47292 | 0.0341278   | 0.156851    | Serpina4-ps1 | serine (or cysteine) peptidase inhibitor, clade A, member 4, pseudogene 1      | 12 | BF383739  |
| 194 | 1424709_at   | -1.48211 | 5.09E-06    | 0.000716971 | Sc5d         | sterol-C5-desaturase (fungal ERG3, delta-5-desaturase) homolog (S. cerevisiae) | 9  | AB016248  |
| 195 | 1444297_at   | -1.50419 | 0.0450803   | 0.186838    | Serpina4-ps1 | serine (or cysteine) peptidase inhibitor, clade A, member 4, pseudogene 1      | 12 | BF383739  |
| 196 | 1450264_a_at | -1.50859 | 1.72E-06    | 0.000395031 | Chka         | choline kinase alpha                                                           | 19 | NM_013490 |
| 197 | 1438751_at   | -1.55419 | 1.63E-06    | 0.000387662 | Slc30a10     | solute carrier family 30, member 10                                            | 1  | BB736474  |
| 198 | 1427838_at   | -1.57107 | 3.44E-05    | 0.00206133  | Tubb2a       | tubulin, beta 2A                                                               | 13 | M28739    |
| 199 | 1417065_at   | -1.57312 | 0.00728926  | 0.0598132   | Egr1         | early growth response 1                                                        | 18 | NM_007913 |
| 200 | 1433944_at   | -1.5796  | 2.29E-05    | 0.00158802  | Hectd2       | HECT domain containing 2                                                       | 19 | AV256030  |
| 201 | 1437073_x_at | -1.59842 | 0.00010628  | 0.00403101  |              |                                                                                |    | BB115446  |
| 202 | 1431817_at   | -1.62207 | 0.000564877 | 0.0113838   | Adh6-ps1     | alcohol dehydrogenase 6 (class V), pseudogene 1                                | 3  | AK004863  |
| 203 | 1439300_at   | -1.66346 | 5.00E-05    | 0.00258327  | Chic1        | cysteine-rich hydrophobic domain 1                                             | X  | BG065782  |
| 204 | 1427347_s_at | -1.66595 | 0.000243917 | 0.0067875   | Tubb2a       | tubulin, beta 2A                                                               | 13 | BC003475  |
| 205 | 1450018_s_at | -1.69185 | 0.000133709 | 0.0046441   | Slc25a30     | solute carrier family 25, member 30                                            | 14 | BB032012  |
| 206 | 1433898_at   | -1.73693 | 0.000142778 | 0.00482756  |              |                                                                                |    | AV000840  |
| 207 | 1450252_at   | -1.80084 | 0.0117099   | 0.0807647   | Onecut1      | one cut domain, family member 1                                                | 9  | NM_008262 |
| 208 | 1448092_x_at | -1.89626 | 0.0124239   | 0.0838234   | Serpina4-ps1 | serine (or cysteine) peptidase inhibitor, clade A, member 4, pseudogene 1      | 12 | AA267743  |
| 209 | 1420722_at   | -2.03359 | 6.86E-08    | 7.18E-05    | Elovl3       | elongation of very long chain fatty acids (FEN1/Elo2, SUR4/Elo3, yeast)-like 3 | 19 | BC016468  |
| 210 | 1421447_at   | -2.38181 | 0.00187298  | 0.0248786   |              |                                                                                |    | NM_008262 |
